# Supplementary material for: Older adults with pre-existing noncommunicable conditions and their healthcare access amid COVID-19 pandemic: a cross-sectional study in eastern Nepal
Source: PubMed Central journal article supplement — BMJ Open. 2022 Feb 3;12(2):e056342. doi: 10.1136/bmjopen-2021-056342 (PMC8814747; doi:10.1136/bmjopen-2021-056342), 2022-02-03
Supplement: bmjopen-2021-056342.draft_revisions.pdf [file bmjopen-2021-056342.draft_revisions.pdf]

# BMJ Open

BMJ Open is committed to open peer review. As part of this commitment we make the peer review history of every article we publish publicly available.

When an article is published we post the peer reviewers' comments and the authors' responses online. We also post the versions of the paper that were used during peer review. These are the versions that the peer review comments apply to.

The versions of the paper that follow are the versions that were submitted during the peer review process. They are not the versions of record or the final published versions. They should not be cited or distributed as the published version of this manuscript.

BMJ Open is an open access journal and the full, final, typeset and author-corrected version of record of the manuscript is available on our site with no access controls, subscription charges or pay-per-view fees (<http://bmjopen.bmj.com>).

If you have any questions on BMJ Open's open peer review process please email [info.bmjopen@bmj.com](mailto:info.bmjopen@bmj.com)

# BMJ Open

## Older adults with pre-existing noncommunicable conditions and their healthcare access amid COVID-19 pandemic in Nepal: findings from eastern Nepal

|                               |                                                                                                                                                                                                                                                                                                                                                                                                                                                                                                                                                                                                                                                              |
|-------------------------------|--------------------------------------------------------------------------------------------------------------------------------------------------------------------------------------------------------------------------------------------------------------------------------------------------------------------------------------------------------------------------------------------------------------------------------------------------------------------------------------------------------------------------------------------------------------------------------------------------------------------------------------------------------------|
| Journal:                      | <i>BMJ Open</i>                                                                                                                                                                                                                                                                                                                                                                                                                                                                                                                                                                                                                                              |
| Manuscript ID                 | bmjopen-2021-056342                                                                                                                                                                                                                                                                                                                                                                                                                                                                                                                                                                                                                                          |
| Article Type:                 | Original research                                                                                                                                                                                                                                                                                                                                                                                                                                                                                                                                                                                                                                            |
| Date Submitted by the Author: | 14-Aug-2021                                                                                                                                                                                                                                                                                                                                                                                                                                                                                                                                                                                                                                                  |
| Complete List of Authors:     | Ghimire, Saruna; Miami University, Department of Sociology and Gerontology<br>Shrestha , Aman; Miami University, Department of Sociology and Gerontology<br>Yadav, Uday; Miami University, Department of Sociology and Gerontology; ARCED Foundation<br>Mistry, Sabuj Kanti; ARCED Foundation<br>Chapadia, Bunsu; Miami University, Department of Microbiology<br>Yadav, Om Prakash<br>Ali, ARM Mehrab ; ARCED Foundation<br>Rawal, Lal; Central Queensland University, School of Health Medical and Applied Sciences<br>Yadav, Priyanka; Center for Research<br>Mehata, Suresh; Government of Nepal Ministry of Health and Population<br>Harris, Mark; UNSW |
| Keywords:                     | COVID-19, EPIDEMIOLOGY, Health policy < HEALTH SERVICES ADMINISTRATION & MANAGEMENT, Public health < INFECTIOUS DISEASES                                                                                                                                                                                                                                                                                                                                                                                                                                                                                                                                     |
|                               |                                                                                                                                                                                                                                                                                                                                                                                                                                                                                                                                                                                                                                                              |

SCHOLARONE™  
Manuscripts

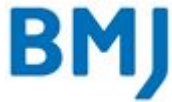

I, the Submitting Author has the right to grant and does grant on behalf of all authors of the Work (as defined in the below author licence), an exclusive licence and/or a non-exclusive licence for contributions from authors who are: i) UK Crown employees; ii) where BMJ has agreed a CC-BY licence shall apply, and/or iii) in accordance with the terms applicable for US Federal Government officers or employees acting as part of their official duties; on a worldwide, perpetual, irrevocable, royalty-free basis to BMJ Publishing Group Ltd ("BMJ") its licensees and where the relevant Journal is co-owned by BMJ to the co-owners of the Journal, to publish the Work in this journal and any other BMJ products and to exploit all rights, as set out in our [licence](#).

The Submitting Author accepts and understands that any supply made under these terms is made by BMJ to the Submitting Author unless you are acting as an employee on behalf of your employer or a postgraduate student of an affiliated institution which is paying any applicable article publishing charge ("APC") for Open Access articles. Where the Submitting Author wishes to make the Work available on an Open Access basis (and intends to pay the relevant APC), the terms of reuse of such Open Access shall be governed by a Creative Commons licence – details of these licences and which [Creative Commons](#) licence will apply to this Work are set out in our licence referred to above.

Other than as permitted in any relevant BMJ Author's Self Archiving Policies, I confirm this Work has not been accepted for publication elsewhere, is not being considered for publication elsewhere and does not duplicate material already published. I confirm all authors consent to publication of this Work and authorise the granting of this licence.

# Older adults with pre-existing noncommunicable conditions and their healthcare access amid COVID-19 pandemic in Nepal: findings from eastern Nepal

<sup>1</sup>Saruna Ghimire<sup>1</sup>, Aman Shrestha<sup>1</sup>, \*<sup>1</sup>Uday Narayan Yadav<sup>2,3</sup>, Sabuj Kanti Mistry<sup>3,4,5</sup>, Bunsu Chapadia<sup>6</sup>, Om Prakash Yadav<sup>7</sup>, ARM Mehrab Ali<sup>5</sup>, Lal B Rawal<sup>8</sup>, Priyanka Yadav<sup>2</sup>, Suresh Mehta<sup>7</sup>, Mark Fort Harris<sup>3</sup>

<sup>1</sup>Department of Sociology and Gerontology and Scripps Gerontology Center, Miami University, 45056, Oxford, OH, USA

<sup>2</sup>Center for Research, Policy and Implementation, Biratnagar 56613, Nepal

<sup>3</sup>Centre for Primary Health Care and Equity, University of New South Wales, Sydney, Australia

<sup>4</sup>BRAC James P Grant School of Public Health, BRAC University, 68 Shahid Tajuddin Ahmed Sharani, Mohakhali, Dhaka-1212, Bangladesh

<sup>5</sup>ARCED Foundation, 13/1, Pallabi, Mirpur-12, Dhaka, Bangladesh

<sup>6</sup>Department of Microbiology, Miami University, 45056, Oxford, OH, USA

<sup>7</sup>Ministry of Health and Population, Kathmandu, Nepal

<sup>8</sup>School of Health Medical and Social Sciences, College of Science and Sustainability, Central Queensland University, Sydney Campus, Australia

<sup>†</sup>Equal contribution

\*Corresponding author: Uday Narayan Yadav, Centre for Research Policy and Implementation /Centre for Primary Health Care and Equity, University of New South Wales, Sydney, Australia; E-mail: [unyadav1@gmail.com](mailto:unyadav1@gmail.com) / [u.yadav@unsw.edu.au](mailto:u.yadav@unsw.edu.au)

## Abstract

### Objectives

COVID-19 has greatly impacted older adults with pre-existing noncommunicable conditions (hereafter called pre-existing conditions) in terms of their access to essential healthcare services. Based on the theory of vertical health equity, this study investigated access to healthcare by Nepali older adults with pre-existing conditions during the COVID-19 pandemic.

### Methods

A cross-sectional study surveyed 847 randomly selected older adults ( $\geq 60$  years) in three districts of eastern Nepal. Survey questionnaire, administered by trained community health workers, collected information on participants reported difficulty obtaining routine care and medications during the pandemic, in addition to questions on demographics, socioeconomic factors, and pre-existing conditions. Cumulative scores for pre-existing conditions were recoded as no pre-existing condition, single condition, and multimorbidity for the analyses. Chi-square tests and binary logistic regressions determined inferences.

### Results

Nearly two-thirds of the participants had a pre-existing condition (43.8% single condition and 22.8% multimorbid) and reported experiencing difficulty obtaining routine care (52.8%) and medications (13.5%). Participants with single (OR: 3.06, 95%CI: 2.17-4.32) and multimorbid (OR: 5.62, 95%CI: 3.63-8.71) conditions had three and five-fold increased odds of experiencing difficulty accessing routine care. Findings were similar for difficulty obtaining medication (OR single: 3.12, 95%CI: 1.71-5.69; OR multimorbid: 3.98, 95%CI: 2.01-7.87) where odds were greater than three-folds.

### Conclusions

Older adults with pre-existing conditions in Nepal, who require routine medical care and medication, faced significant difficulties obtaining them during the pandemic, which may lead to deterioration in their pre-existing conditions. Public health emergency preparedness should incorporate plans for both managing the emergency and providing continuing care.

**Keywords:** Older adults, pre-existing noncommunicable conditions, healthcare access, COVID-19.

### Strengths and limitation of this study

- This is the first study from Nepal that reported older adults with NCDs facing difficulty in receiving routine medical care and medication amid COVID-19 pandemic.
- The study findings are framed within the principle of vertical health equity.
- This study reminds us to revisit national emergency preparedness and revise future planning using a more holistic approach, addressing both emerging and existing healthcare needs.
- This is a cross-sectional study, therefore causality cannot be inferred.
- The information on pre-existing conditions was self-reported and many of study participants may not be aware of their sub-clinical conditions, which may have introduced misclassification bias in the measurements, thereby underestimating the true burden of pre-existing conditions

### Background

In Nepal, a South Asian country nestled in the Himalayas between India and China, population aging is a relatively new yet rapidly expanding issue. Consistent with the United Nation's definition, Nepal's Senior Citizens Act [1] identified individuals aged 60 and older as senior citizens. In accordance with the global trend, Nepal has been observing a continuous decline in mortality rates and an increase in life expectancy from 54.3 to 66.6 years between 1991 to 2011 [2]. Although the overall national population growth rate is declining, that of the older population is increasing and exceeds the national average growth rate (1.4% vs. 3.1%) [2]. Furthermore, from 1991 to 2011, Nepal, in late demographic transition, has experienced a significant increase in the aging index (from 13.6 to 23.3) and median age (from 18.9 to 22.3 years), reminding the society to be prepared to address the social, economic and health needs of burgeoning Nepali older adults [2]. While population aging is an emerging and neglected topic in Nepal [3], the increased vulnerability of the older population due to the ongoing pandemic has provoked us to revisit their health needs.

Nepal experienced an epidemiological shift in terms of declining burden of communicable diseases and a growing burden of noncommunicable disease (NCDs) in the last decade [4]. This means that a significant share of the population has been living for many years with chronic conditions, increasing the burden on Nepal's limited health resources [5]. Among older age groups (50 and older), in 2017, NCDs contributed to 55.3% of the disease burden [6]. In addition to single NCDs, the prevalence of multimorbidity or the presence of two or more chronic conditions is increasing, both globally and in Nepal [7,8]. Multimorbidity is often more challenging than a single condition because of the synergistic impact of multiple conditions, each of which may require a multitude of specialists' referrals, biomedical investigations, and treatments [9]. Although nationwide estimates

1  
2  
3 for multimorbidity are unavailable, estimates from rural parts of Eastern Nepal suggest that one in  
4 seven older adults had multimorbid chronic conditions [7].  
5

6 Nepal has experienced a series of COVID-19 outbreaks; more recently the Delta strain, which has  
7 worsened the COVID-19 situation in Nepal. As of July 6, 2021, the pandemic has claimed 9,263  
8 lives out of 648,085 positive cases in Nepal [10]; the highest proportion of deaths (67.8%) reported  
9 among older adults (>54 years) and all the deceased older adults had at least one pre-existing  
10 condition [11]. In Nepal, cardiovascular diseases, diabetes, and respiratory illness were the most  
11 common conditions linked to COVID-19 deaths [12].  
12  
13

14 Through its commitment to Sustainable Development Goals (SDG), Nepal aims to reduce  
15 premature deaths due to NCDs by one-third by 2030 [13]. People with one or more NCDs have  
16 extensive and diverse health-related needs and require continuity of care, self-management,  
17 medication adherence, and often seek repeated and regular interactions with the health system [14].  
18 The principle of vertical health equity advocates for access to healthcare based on an individual's  
19 needs, i.e., those with greater needs should have greater access to healthcare [15]. Since those with  
20 one or more health problems have greater health needs than those without a health condition, they  
21 should have greater access to healthcare. Moreover, the needs are even greater for those with  
22 multimorbidity.  
23  
24  
25

26 Despite the high needs, Nepal ranks far below the average in the Universal Health Coverage index  
27 [16], meaning that individuals and communities in Nepal do not have access to quality essential  
28 health services due to financial hardship. The COVID-19 pandemic may have further jeopardized  
29 healthcare access. On one hand, the nationwide lockdown, imposed by the Nepal government as a  
30 measure of mass quarantine to contain the COVID-19, may have aggravated the risk factors for  
31 NCDs such as sedentary lifestyles, unhealthy diets, smoking, alcohol, tobacco use, lack of sleep,  
32 non-compliance to medications, etc. [17–19]. On the other hand, it has resulted in the closure of  
33 services connected to day-to-day life like transportation, markets, city centers, and general health  
34 checkups in hospitals [20]. Due to the lockdowns, people have had difficulties not just fulfilling  
35 their everyday needs but also accessing healthcare in the absence of transport services [21].  
36 Consequently, a rapid decrease in the number of per-day patient visits was noted during the  
37 lockdown [22]. Healthcare was inaccessible even pre-COVID, but at that time, it was tightly linked  
38 to income. During the COVID-19 lockdowns, even those who could afford healthcare were  
39 deprived of access [20]. Although the impact of COVID-19 is yet to be fully understood,  
40 inaccessible healthcare due to the COVID-19 pandemic may lead to a deterioration in pre-existing  
41 conditions, increase the severity of disease and disability, escalate premature deaths, and contribute  
42 to major economic loss for the country [23].  
43  
44  
45  
46  
47

48 Previous studies from India, Bangladesh, and Hong Kong have reported difficulty accessing  
49 healthcare and/or obtaining medication during the pandemic [24–26]. Although the previous  
50 literature from Nepal has suggested disruptions in health services amidst the pandemic [20], it is  
51 unknown from patients' perspectives how much difficulty they experienced accessing healthcare  
52 amidst the pandemic. Framing the current study within the principle of vertical health equity, we  
53 aim to assess the relationships between pre-existing conditions and challenges in obtaining routine  
54 healthcare and medications during the COVID-19 pandemic among older adults in eastern Nepal.  
55  
56  
57

## Methodology

This study is reported following the STROBE guidelines [27] (Supplemental Table 1).

### Study design and study participants

This study followed a cross-sectional design and surveyed 847 randomly selected older adults between July and September 2020; further detailed elsewhere [28]. The study took place in three districts of Province 1 in eastern Nepal, namely *Morang*, *Pachthar*, and *Terathum* (Figure 1). While *Morang* lies in the southern plains, *Pachthar* and *Terathum* are hilly districts. The population and key infrastructure indicators for these districts are provided in Supplemental Table 2. Nepali nationals who were residents in the study area for a minimum of a year and aged  $\geq 60$  years were included. Those in institutional settings and with significant hearing and communication problems that interfered with the survey were excluded.

### Data collection and study tools

Surveyors were community health workers, certified in General Medicine, and employed by the Nepal government in the selected study areas. Surveyors received two sessions of orientations via zoom, each four hours long, on study methodology, tools, ethics, and field logistics. Following standard COVID-19 protocols implemented by national and local governments, surveyors visited households and conducted face-to-face interviews using a questionnaire implemented in the KoBoToolbox mobile app. A common group in WhatsApp was used to share and troubleshoot any field problems and to provide consistent information to all field enumerators. Initially developed in English, the study tool was translated into Nepali and pre-tested among ten older adults.

### Study variables

**Dependent variable:** There were two outcome variables: whether participants faced difficulty obtaining 1) routine medical care and 2) prescribed medicines because of the COVID-19 pandemic. For each item, participants expressed their level of difficulty in the four-response Likert scale ('none,' 'some,' 'very much,' 'unable'), which were then dichotomized as no difficulties or difficulties faced (responses 'some,' 'very much,' 'unable').

**Independent variables:** The main independent variable of interest was the presence of pre-existing conditions. Participants were asked if they had any pre-existing conditions diagnosed by a health professional and/or taking any prescription medications for that condition. In multiple response type questions, participants selected all the applicable conditions. Finally, via an open-ended follow-up question, they were asked to specify any other conditions that were not already captured. A cumulative score for all the conditions was calculated for each participant and was categorized into no pre-existing conditions, single condition, and multimorbidity. Definition of chronic conditions is tabulated in Supplemental Table 3.

**Covariates:** Other variables included age, sex, marital status, ethnicity, education, urban/rural residence, current occupation, living arrangement, proximity to the health center, financial hardships to access healthcare, and recipient of social security allowance. All these covariates were categorical with response levels as specified in Table 1.



## Patient and public involvement

Patients and/or the public were not involved in developing research questions, designing, and conducting the study, and disseminating the results.

## Ethics

This study received ethics approval (Ref# 150/2020) from the ethics board of Nepal Health Research Council (NHRC), Kathmandu, Nepal. All study participants provided informed written consent. For participants unable to read and write, proxy written consent was obtained from their close guardians. Participation was voluntary, and older adults did not receive any financial compensation. After completing the interview, community health care providers delivered 10 minutes of counseling services on dealing with COVID-19 was delivered to all participants.

## Statistical analyses

All analyses are performed separately for each of the two dependent variables: access to 1) routine care and 2) medications. Since all our variables were categorical, they are summarized in Table 1 in terms of frequencies and percentages, and the group differences were evaluated using chi-square tests. Binary logistic regression analysis assessed if participants' pre-existing conditions were associated with difficulty obtaining healthcare. A stepwise selection method, using AIC criteria, was used for model selection and started with all the covariates reported in Table 1 while only retaining, in the final model, age, ethnicity, residence, occupation, walking proximity to the nearest health center, and financial hardships with healthcare. The VIF for each variable included in the final model was below 2 suggesting no multicollinearity issues. Adjusted and unadjusted odds ratios and 95% confidence intervals are reported in Table 2. All statistical analyses were conducted using SAS 9.4.

## Results

### Participants' characteristics

The largest proportion of the participants were in their sixties (45.4%), male (51.1%), married (75.8%), minorities (68.4%), without formal schooling (68.4%), urban residents (56.1%), involved in agriculture (47.4%), and living with family (89.1%) (Table 1). More than half of the participants faced financial hardship (55.0%) and received social security allowances (51.5%). Only one-third of the participants were free of pre-existing NCDs conditions; 43.8% had single, and 22.8% had multiple conditions (Table 1).

More than half of the participants reported facing difficulty obtaining healthcare (P=52.8%, 95%CI: 49.4%-56.2%), and 13.5% (95%CI: 11.2%-15.8%) reported facing difficulty obtaining medications. In bivariate analyses, among the covariates, age, ethnicity, occupation, walking proximity to the nearest health center, and financial hardships with healthcare were significantly associated with both of the outcome variables (Table 1); interestingly, only rural residents reported experiencing difficulties obtaining medications.

## Association between pre-existing conditions and difficulty obtaining healthcare and medications during COVID-19

In bivariate analysis, participants' pre-existing conditions were significantly associated with their reported difficulty getting routine healthcare and medications ( $P < 0.001$ ) (Table 1). In the regression analyses (Table 2), participants' pre-existing condition was significantly associated with difficulty obtaining healthcare and medications in both adjusted and unadjusted models. Notably, the strength of the association was greater for those with multimorbidity than those with single conditions. After adjusting for the covariates, compared to participants without any pre-existing conditions, those with single (OR: 3.06, 95%CI: 2.17-4.32) and multiple (OR: 5.62, 95%CI: 3.63-8.71) conditions respectively had about three times and six times higher odds of experiencing difficulties in obtaining routine healthcare. Likewise, for medications, those with single (OR: 3.12, 95%CI: 1.71-5.69) and multiple (OR: 3.98, 95%CI: 2.01-7.87) conditions had more than three times increased odds of experiencing difficulties in obtaining medications (Table 2).

### Discussion

This study found a significant positive association between participants' pre-existing conditions and difficulty obtaining both routine healthcare and medications during the COVID-19 pandemic in three studied districts of eastern Nepal. Those with multiple conditions were even more likely to experience difficulty accessing healthcare than those with single conditions despite their likely increased need.

Although people with pre-existing conditions require routine medical checkups and medication, both during and after pandemic, our participants faced significant difficulty obtaining them. This study is the first of its kind in Nepal, and a similar study is unavailable for direct comparison. However, our findings align with studies conducted in India [25] and Hong Kong [24] among the general population and Bangladesh among the older population [26], which also reported significant challenges faced by those with pre-existing conditions to access healthcare during the pandemic. In India, participants missed follow-up visits, and experienced difficulty in medication procurement, resulting in a worsening of pre-existing symptoms [29].

Acknowledging that inaccessible healthcare is a long-term problem in Nepal, existent even prior to the COVID-19 pandemic, several factors, at both the micro and macro levels, help explain why healthcare was not easily accessible to our participants. We believe the restricted movement and cessation of public transportation, imposed as part of the nationwide lockdown, to be the most important barrier to access. As a preventive measure to curb the spread of the virus, Nepal's government imposed several intermittent nationwide lockdowns of varying lengths. In a country where the majority rely on public transportation and a private vehicle is a privilege enjoyed only by the rich, cessation of public transportation meant that people with existing conditions had no means to reach health facilities, especially in rural areas where facilities are distant. In the current pandemic, it is obvious that an ill-equipped health system may not have been able to maintain essential services because of limited human resources for health (HRH) or shifting of HRH from primary healthcare (PHC) to COVID-19 management centers/hospitals. Furthermore, there were reported interruptions in health service delivery amidst the pandemic [23] due to the closure of peripheral healthcare facilities (such as PHCs, health posts) and fears of COVID-19 transmission

1  
2  
3 among healthcare workers [20,23]. A rapid assessment of 163 countries by the World Health  
4 Organization on the impact of the COVID-19 pandemic on NCDs resources and services revealed  
5 a considerable disruption to NCDs services in many countries, and in some South Asian countries,  
6 the government funds for NCDs were reallocated to COVID-19 treatment and management [23].  
7

8 The pandemic has been overwhelming, but we know that its impact is likely to wane over the next  
9 few years. So, what are the implications of our findings beyond the COVID-19 pandemic? The  
10 broader implications of our findings should be contextualized within the context of historical,  
11 contemporary, and inevitable future outbreaks and public health emergencies. Although “We are  
12 all in this together” was a highly popularized phrase during the pandemic, evidences suggests  
13 significant inequalities in severe morbidity and mortality during a pandemic, whereby certain age  
14 groups, minorities, and those with low socioeconomic status bear the greater impact, as noted  
15 during the 1918 Spanish influenza pandemic, the 2009 H1N1 outbreak, and the current COVID-  
16 19 pandemic [30,31]. The noted disparities, in the grounds of social determinants of health, point  
17 to the gaps in our emergency preparedness and the failure of society to protect the most vulnerable  
18 in a time of catastrophe.  
19  
20  
21

22  
23 Although focusing on curative and preventive strategies to curb the pandemic is important, it  
24 should be noted that health systems have dual responsibilities in both responding to the outbreak  
25 as well as providing essential health services, especially to those with greater needs, such as older  
26 adults with NCDs. As demonstrated by previous [32,33] and current studies, the latter was  
27 neglected in many countries, thus depriving people with NCDs of access to continuing care and  
28 essential medications. At the policy level, Nepal’s COVID-19 response plan has no specific  
29 prioritization and provisions for either older adults and/or people with NCDs [34]. Policymakers  
30 in Nepal should recognize that the impact of the COVID-19 pandemic can only be mitigated if  
31 strategies to provide essential routine services to their vulnerable population are in place. These  
32 strategies should be informed by epidemiological data, health system capacity, and available  
33 resources during health crises. Given the disruption of healthcare access during the COVID-19  
34 pandemic, there is a need to co-design and evaluate new models of care with the engagement of  
35 key stakeholders, citizens, developmental partners, local and decision-makers. These models of  
36 care should be designed in a way that it can meet the health needs of the population during and  
37 beyond the pandemic. One important strategy is putting PHC at the center of emergency response  
38 plan to address the healthcare needs at the community level. There is an opportunity to focus on  
39 developing alternative pathways to deliver health services and essential drugs such as door-to-door  
40 services, mobilizing community health workers, expanding telehealth or mobile health, and remote  
41 health consultations [23].  
42  
43  
44

### 45 **Strength, limitations, and generalizability of the findings**

46

47 This study is one of its first kind from Nepal to assess challenges to healthcare access amidst the  
48 pandemic among older adults with NCDs. Large sample size, the inclusion of both urban and rural  
49 areas, and data collection by trained community health workers add to the reliability of the data.  
50 However, this study also has some limitations. The first is that due to the cross-sectional study  
51 design, it is not possible to infer causality. However, the questionnaire did ask respondents to  
52 respond to questions with reference to “compared to before COVID” and “due to COVID”; thus,  
53 the responses reflected their view of changes that had occurred. The information on pre-existing  
54 conditions was self-reported, and we believe it to be underestimated because, in the Nepali context,  
55  
56  
57

1  
2  
3 it is common to access healthcare only when the symptoms are obvious and severe. Hence, many  
4 of our participants may not be aware of their sub-clinical conditions, which may have introduced  
5 misclassification bias in the measurements, thereby underestimating the true burden of pre-existing  
6 conditions. The study districts are in hills and plain areas of eastern Nepal, and thus the findings  
7 may not be generalizable to other settings of Nepal. Our study did not assess reasons for access  
8 problems, and future studies should explore the underlying reasons for inaccessibility.  
9  
10

## 11 **Conclusions**

12  
13 Nepali older adults with one or more pre-existing conditions, despite their higher health needs,  
14 faced more difficulties obtaining routine healthcare and medications during the COVID-19  
15 pandemic, which is against the principle of vertical health inequity. Policymakers, healthcare  
16 practitioners, and local stakeholders should be cognizant of the existing inequality in healthcare  
17 and urgently address the gaps in healthcare accessibility for older adults with NCDs. The broader  
18 consequences of inaccessible healthcare during the pandemic and its subsequent impact on Nepal's  
19 commitment to the attainment of SDG-3 of reducing NCDs burden by one-third by 2030 [13] is  
20 yet to be fully understood. Yet, the pandemic reminds us to revisit our national emergency  
21 preparedness and revise future planning using a more holistic approach, addressing both emerging  
22 and existing healthcare needs.  
23  
24  
25  
26  
27

## 28 **List of abbreviations:**

29  
30 NCD: Non-communicable disease

31  
32 OR: Odds Ratio

33  
34 CI: Confidence Interval

35  
36 STROBE: The Strengthening the Reporting of Observational Studies in Epidemiology

37  
38 SDG: Sustainable Development Goal  
39

## 40 **Consent for publication**

41  
42 NA  
43

## 44 **Availability of data and materials**

45  
46  
47 The data that support the findings of this study are available and an anonymized dataset is  
48 included as an additional supporting file.  
49

## 50 **Competing interests**

51  
52  
53 The authors received no financial support for the research or publication of this article and have  
54 no conflict of interests to declare regarding the publication of this paper  
55  
56  
57

## Funding

The authors received no financial support for the research

## Authors' contributions

UNY, SG, SKM and MFH conceived the idea. UNY, OPY and SM collected the data. SG and AS analyzed the data. SG, AS and UNY drafted the first draft. All authors contributed significantly and approved the final version.

## Acknowledgements

We want to thank the local-level authorities of the government of Nepal for their support in helping us in collecting the information from participants. The work would not have been completed without the support of District health officers (Mr. Gyan Bahadur Basnet -Morang DHO, Mr. Yograj Ghimire-Terhathum DHO and Mr. Naradmuni Subedi-Panchthar DHO) and health care workers (Sushma Giri, Hima Rai, Shivshankar Mandal, Renuka Shrestha, Sabina Chaudhary, Ranju Khadka, Ukisha Shrestha and Kalpana Ram). Moreover, we are indebted to all the participants of this study.

## References

1. Nepal Law Commission. *Senior Citizens Act, 2063 (2006)*. Kathmandu, 2006.
2. Nepal ed. *Population Monograph of Nepal*. Kathmandu: Government of Nepal, National Planning Commission Secretariat, Central Bureau of Statistics, 2014.
3. Shrestha L. Geriatric health in Nepal: Concerns and experience. *Nepal Medical College Journal* 2013;**15**:148–52.
4. Sharma SR, Page R, Matheson A *et al*. Non-communicable disease prevention in Nepal: Systemic challenges and future directions. *Global Health Promotion* 2019;**26**:94–7.
5. Mishra SR, Shrestha N, Gyawali B *et al*. *The Changing Patterns of Non-Communicable Diseases and Injuries in Nepal from 1990-2017: A Review of Evidence from Global Burden of Disease Study 2017*. In Review, 2020.
6. Roser M, Ritchie H. Burden of Disease. *Our World in Data* 2016.
7. Yadav UN, Ghimire S, Mistry SK *et al*. Prevalence of non-communicable chronic conditions, multimorbidity and its correlates among older adults in rural Nepal: A cross-sectional study. *BMJ Open* 2021;**11**:e041728.

- 1  
2  
3 8. Souza DLB, Oliveras-Fabregas A, Minobes-Molina E *et al.* Trends of multimorbidity in 15  
4 European countries: a population-based study in community-dwelling adults aged 50 and over.  
5 *BMC Public Health* 2021;**21**:76.  
6
- 7  
8 9. Marengoni A, Angleman S, Melis R *et al.* Aging with multimorbidity: A systematic review of  
9 the literature. *Ageing Research Reviews* 2011;**10**:430–9.  
10
- 11 10. Ministry of Health and Population, Nepal. COVID19-Dashboard. Available at:  
12 <https://covid19.mohp.gov.np/>.  
13
- 14 11. Rayamajhee B, Pokhrel A, Syangtan G *et al.* How well the government of Nepal is  
15 responding to covid-19? An experience from a resource-limited country to confront  
16 unprecedented pandemic. *Front Public Health* 2021;**9**:597808.  
17
- 18 12. Panthee B, Dhungana S, Panthee N *et al.* Clinical and epidemiological features of COVID-19  
19 deaths in Nepal. *New Microbes and New Infections* 2020;**38**:100797.  
20
- 21 13. United Nations. *Transforming Our World: The 2030 Agenda for Sustainable Development*.  
22  
23
- 24 14. Hopman P, Schellevis FG, Rijken M. Health-related needs of people with multiple chronic  
25 diseases: differences and underlying factors. *Qual Life Res* 2016;**25**:651–60.  
26
- 27 15. O'Donnell O, van Doorslaer E, Wagstaff A *et al.* *Analyzing Health Equity Using Household*  
28 *Survey Data: A Guide to Techniques and Their Implementation*. The World Bank, 2007.  
29
- 30 16. World Health Organization. *World Health Statistics 2019: Monitoring Health for the SDGs :*  
31 *Sustainable Development Goals.*, 2019.  
32  
33
- 34 17. Yadav UN, Rayamajhee B, Mistry SK *et al.* A syndemic perspective on the management of  
35 non-communicable diseases amid the covid-19 pandemic in low- and middle-income countries.  
36 *Front Public Health* 2020;**8**:508.  
37
- 38 18. Gupta SK, Lakshmi PVM, Kaur M *et al.* Role of self-care in COVID-19 pandemic for people  
39 living with comorbidities of diabetes and hypertension. *Journal of Family Medicine and Primary*  
40 *Care* 2020;**9**:5495–501.  
41
- 42 19. Kluge HHP, Wickramasinghe K, Rippin HL *et al.* Prevention and control of non-  
43 communicable diseases in the COVID-19 response. *The Lancet* 2020;**395**:1678–80.  
44  
45
- 46 20. Singh DR, Sunuwar DR, Shah SK *et al.* Impact of COVID-19 on health services utilization  
47 in Province-2 of Nepal: A qualitative study among community members and stakeholders. *BMC*  
48 *health services research* 2021;**21**:174.  
49
- 50 21. Amatya Y, Douglas AH, Gurung ND *et al.* Barriers to accessing healthcare during COVID-  
51 19 lockdown: A point prevalence study amongst patients attending emergency and general out-  
52 patient clinics of patan hospital, Nepal. *Open Access Journal of Public Health*.  
53  
54  
55  
56  
57

- 1  
2  
3 22. Kc A, Gurung R, Kinney MV *et al.* Effect of the COVID-19 pandemic response on  
4 intrapartum care, stillbirth, and neonatal mortality outcomes in Nepal: A prospective  
5 observational study. *The Lancet Global Health* 2020;**8**:e1273–81.  
6  
7 23. World Health Organization. *The Impact of the COVID-19 Pandemic on Noncommunicable*  
8 *Disease Resources and Services: Results of a Rapid Assessment*. Geneva: World Health  
9 Organization, 2020.  
10  
11 24. Chan EYY, Kim JH, Lo ESK *et al.* What happened to people with non-communicable  
12 diseases during covid-19: Implications of H-EDRM policies. *International Journal of*  
13 *Environmental Research and Public Health* 2020;**17**:E5588.  
14  
15 25. Pati S, Mahapatra P, Kanungo S *et al.* Managing multimorbidity (multiple chronic diseases)  
16 amid covid-19 pandemic: a community based study from Odisha, India. *Frontiers in Public*  
17 *Health* 2020;**8**:584408.  
18  
19 26. Mistry SK, Ali AM, Yadav UN *et al.* Older adults with non-communicable chronic  
20 conditions and their health care access amid COVID-19 pandemic in Bangladesh: Findings from  
21 a cross-sectional study.  
22  
23 27. Von Elm E, Altman DG, Egger M *et al.* The strengthening the reporting of observational  
24 studies in epidemiology (strobe) statement: Guidelines for reporting observational studies.  
25 *Epidemiology* 2007;**18**:800–4.  
26  
27 28. Yadav U, Yadav OP, Singh DR *et al.* Perceived fear of covid-19 and its associated factors  
28 among Nepalese older adults in eastern Nepal: Findings from a cross-sectional study. 2020, DOI:  
29 10.21203/rs.3.rs-125117/v1.  
30  
31 29. Gummidi B, John O, Jha V. Continuum of care for non-communicable diseases during  
32 COVID-19 pandemic in rural India: A mixed methods study. *Journal of Family Medicine and*  
33 *Primary Care* 2020;**9**:6012–7.  
34  
35 30. Marmot M, Allen J. COVID-19: Exposing and amplifying inequalities. *Journal of*  
36 *Epidemiology and Community Health* 2020;**74**:681–2.  
37  
38 31. Bambra C, Riordan R, Ford J *et al.* The COVID-19 pandemic and health inequalities.  
39 *Journal of Epidemiology and Community Health* 2020;**74**:964–8.  
40  
41 32. Chudasama YV, Gillies CL, Zaccardi F *et al.* Impact of COVID-19 on routine care for  
42 chronic diseases: A global survey of views from healthcare professionals. *Diabetes & Metabolic*  
43 *Syndrome* 2020;**14**:965–7.  
44  
45 33. Saqib MAN, Siddiqui S, Qasim M *et al.* Effect of COVID-19 lockdown on patients with  
46 chronic diseases. *Diabetes & Metabolic Syndrome* 2020;**14**:1621–3.  
47  
48 34. , Ministry of Health and Population, Government of Nepal. Health sector emergency  
49 response plan: COVID-19 Pandemic. 2020.  
50  
51  
52  
53  
54  
55  
56  
57  
58  
59  
60

**Table 1. Characteristics of the study participants- overall and by their experiences in obtaining healthcare during the COVID-19 pandemic.**

|                                                       | Overall n (%)<br>(N=843) | Difficulty obtaining healthcare n (%) |                      |                          | Difficulty obtaining medications n (%) |                      |                      |
|-------------------------------------------------------|--------------------------|---------------------------------------|----------------------|--------------------------|----------------------------------------|----------------------|----------------------|
|                                                       |                          | Yes<br>(n=445, 52.8%)                 | No<br>(n=398, 47.2%) | <sup>1</sup> p-<br>Value | Yes<br>(n=114, 13.5%)                  | No<br>(n=729, 86.5%) | <sup>1</sup> p-Value |
| <b>Age in years</b>                                   |                          |                                       |                      |                          |                                        |                      |                      |
| 60-69                                                 | 383 (45.4)               | 164 (36.9)                            | 219 (55.0)           | <0.001                   | 35 (30.7)                              | 348 (47.7)           | 0.001                |
| 70-79                                                 | 315 (37.4)               | 189 (42.5)                            | 126 (31.7)           |                          | 59 (51.8)                              | 256 (35.1)           |                      |
| 80+                                                   | 145 (17.2)               | 92 (20.7)                             | 53 (13.3)            |                          | 20 (17.5)                              | 125 (17.1)           |                      |
| <b>Sex</b>                                            |                          |                                       |                      |                          |                                        |                      |                      |
| Female                                                | 412 (48.9)               | 229 (51.5)                            | 183 (46.0)           | 0.112                    | 44 (38.6)                              | 368 (50.5)           | 0.018                |
| Male                                                  | 431 (51.1)               | 216 (48.5)                            | 215 (54.0)           |                          | 70 (61.4)                              | 361 (49.5)           |                      |
| <b><sup>2</sup>Marital status</b>                     |                          |                                       |                      |                          |                                        |                      |                      |
| Married                                               | 639 (75.8)               | 321 (72.1)                            | 318 (79.9)           | 0.009                    | 93 (81.6)                              | 546 (74.9)           | 0.121                |
| Without partner                                       | 204 (24.2)               | 124 (27.9)                            | 80 (20.1)            |                          | 21 (18.4)                              | 183 (25.1)           |                      |
| <b>Ethnicity</b>                                      |                          |                                       |                      |                          |                                        |                      |                      |
| Brahmins/Chhetri                                      | 266 (31.6)               | 159 (35.7)                            | 107 (26.9)           | 0.006                    | 18 (15.8)                              | 248 (34.0)           | <0.001               |
| Minorities and others                                 | 577 (68.4)               | 286 (64.3)                            | 291 (73.1)           |                          | 96 (84.2)                              | 481 (66.0)           |                      |
| <b>Education</b>                                      |                          |                                       |                      |                          |                                        |                      |                      |
| No formal schooling                                   | 577 (68.4)               | 298 (67.0)                            | 279 (70.1)           | 0.328                    | 70 (61.4)                              | 507 (69.5)           | 0.082                |
| Formal schooling                                      | 266 (31.6)               | 147 (33.0)                            | 119 (29.9)           |                          | 44 (38.6)                              | 222 (30.5)           |                      |
| <b>Residence</b>                                      |                          |                                       |                      |                          |                                        |                      |                      |
| Rural                                                 | 370 (43.9)               | 204 (45.8)                            | 166 (41.7)           | 0.227                    | 114 (100.0)                            | 256 (35.1)           | NA                   |
| Urban                                                 | 473 (56.1)               | 241 (54.2)                            | 232 (58.3)           |                          | 0                                      | 473 (64.9)           |                      |
| <b>Current occupation</b>                             |                          |                                       |                      |                          |                                        |                      |                      |
| Agriculture                                           | 400 (47.4)               | 231 (51.9)                            | 169 (42.5)           | 0.001                    | 88 (77.2)                              | 312 (42.8)           | <0.001               |
| Non-agriculture                                       | 169 (20.0)               | 68 (15.3)                             | 101 (25.4)           |                          | 12 (10.5)                              | 157 (21.5)           |                      |
| Housewife/Retired                                     | 274 (32.5)               | 146 (32.8)                            | 128 (32.2)           |                          | 14 (12.3)                              | 260 (35.7)           |                      |
| <b>Living arrangement</b>                             |                          |                                       |                      |                          |                                        |                      |                      |
| Live alone                                            | 92 (10.9)                | 51 (11.5)                             | 41 (10.3)            | 0.590                    | 11 (9.6)                               | 81 (11.1)            | 0.642                |
| Live with family                                      | 751 (89.1)               | 394 (88.5)                            | 357 (89.7)           |                          | 103 (90.4)                             | 648 (88.9)           |                      |
| <b>Walking proximity to the nearest health center</b> |                          |                                       |                      |                          |                                        |                      |                      |
| < 30 minutes                                          | 272 (32.3)               | 124 (27.9)                            | 148 (37.2)           | 0.006                    | 41 (36.0)                              | 231 (31.7)           | 0.000                |
| 30-60 minutes                                         | 372 (44.1)               | 201 (45.2)                            | 171 (43.0)           |                          | 32 (28.1)                              | 340 (46.6)           |                      |
| > 60 minutes                                          | 199 (23.6)               | 120 (27.0)                            | 79 (19.8)            |                          | 41 (36.0)                              | 158 (21.7)           |                      |
| <b>Financial hardships with healthcare</b>            |                          |                                       |                      |                          |                                        |                      |                      |
| No                                                    | 379 (45.0)               | 184 (41.3)                            | 195 (49.0)           | 0.026                    | 65 (57.0)                              | 314 (43.1)           | 0.005                |
| Yes                                                   | 464 (55.0)               | 261 (58.7)                            | 203 (51.0)           |                          | 49 (43.0)                              | 415 (56.9)           |                      |



|                                                   |            |            |            |        |           |            |        |  |
|---------------------------------------------------|------------|------------|------------|--------|-----------|------------|--------|--|
| <b>Receiving social security allowance</b>        |            |            |            |        |           |            |        |  |
| No                                                | 409 (48.5) | 185 (41.6) | 224 (56.3) | <0.001 | 51 (44.7) | 358 (49.1) | 0.385  |  |
| Yes                                               | 434 (51.5) | 260 (58.4) | 174 (43.7) |        | 63 (55.3) | 371 (50.9) |        |  |
| <b><sup>3</sup>Pre-existing (NCDs) conditions</b> |            |            |            |        |           |            |        |  |
| None                                              | 282 (33.5) | 84 (18.9)  | 198 (49.7) | <0.001 | 17 (14.9) | 265 (36.4) | <0.001 |  |
| Single condition                                  | 369 (43.8) | 220 (49.4) | 149 (37.4) |        | 60 (52.6) | 309 (42.4) |        |  |
| Multimorbidity                                    | 192 (22.8) | 141 (31.7) | 51 (12.8)  |        | 37 (32.5) | 155 (21.3) |        |  |

<sup>1</sup>P-values from a chi-square test comparing participants experiencing and not experiencing difficulty.

<sup>2</sup>Includes widowed, separated, and never married. <sup>3</sup>NCDs= Non-communicable diseases.

**Table 2. Association between pre-existing (NCDs) conditions and difficulty obtaining healthcare and medications**

|                                                   | Difficulty obtaining healthcare |                                  | Difficulty obtaining medications |                                  |
|---------------------------------------------------|---------------------------------|----------------------------------|----------------------------------|----------------------------------|
|                                                   | Unadjusted OR (95%CI)           | <sup>a</sup> Adjusted OR (95%CI) | Unadjusted OR (95%CI)            | <sup>b</sup> Adjusted OR (95%CI) |
| <b><sup>1</sup>Pre-existing (NCDs) conditions</b> |                                 |                                  |                                  |                                  |
| None                                              | Reference                       |                                  | Reference                        |                                  |
| Single condition                                  | <b>3.48 (2.50 - 4.84)</b>       | <b>3.06 (2.17 - 4.32)</b>        | <b>3.03 (1.72 - 5.31)</b>        | <b>3.12 (1.71 - 5.69)</b>        |
| Multimorbidity                                    | <b>6.52 (4.33 - 9.81)</b>       | <b>5.62 (3.63 - 8.71)</b>        | <b>3.72 (2.03 - 6.83)</b>        | <b>3.98 (2.01 - 7.87)</b>        |

<sup>1</sup>NCDs= Non-communicable diseases. Statistically significant odds ratios are bolded.

<sup>a</sup>Adjusted for age, ethnicity, residence, occupation, walking proximity to the nearest health center, and financial hardships with healthcare .

<sup>b</sup>Adjusted for age, ethnicity, occupation, walking proximity to the nearest health center, and financial hardships with healthcare .

1  
2  
3  
4  
5 Figure 1. Map of Nepal highlighting the three study districts in the eastern region.  
6  
7  
8  
9  
10  
11  
12  
13  
14  
15  
16  
17  
18  
19  
20  
21  
22  
23  
24  
25  
26  
27  
28  
29  
30  
31  
32  
33  
34  
35  
36  
37  
38  
39  
40  
41  
42  
43  
44  
45  
46  
47

For peer review only

1  
2  
3  
4  
5  
6  
7  
8  
9  
10  
11  
12  
13  
14  
15  
16  
17  
18  
19  
20  
21  
22  
23  
24  
25  
26  
27  
28  
29  
30  
31  
32  
33  
34  
35  
36  
37  
38  
39  
40  
41  
42  
43  
44  
45  
46  
47  
48  
49  
50  
51  
52  
53  
54  
55  
56  
57  
58  
59  
60

For peer review only

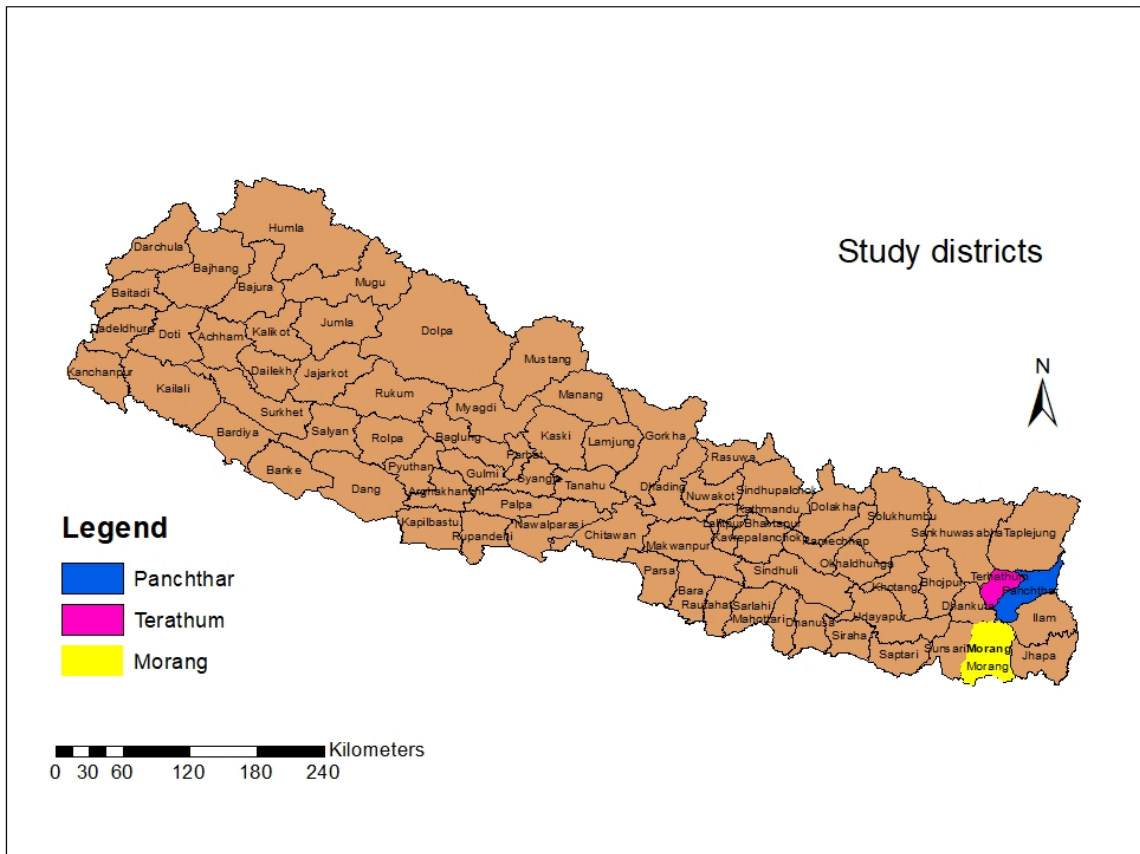

Figure 1. Map of Nepal highlighting the three study districts in the eastern region.

**Supplemental Table 2: Demographic and socioeconomic characteristics of study districts**

| Attributes                                                                                                                                                                                                                                                                            | National   | Study districts |          |          |
|---------------------------------------------------------------------------------------------------------------------------------------------------------------------------------------------------------------------------------------------------------------------------------------|------------|-----------------|----------|----------|
|                                                                                                                                                                                                                                                                                       |            | Morang          | Pachthar | Terathum |
| Total Population                                                                                                                                                                                                                                                                      | 26,494,504 | 965,370         | 191,817  | 101,577  |
| 60+ Population                                                                                                                                                                                                                                                                        | 2,154,410  | 79,636          | 16,918   | 9,946    |
| 60+ Male                                                                                                                                                                                                                                                                              | 1,063,949  | 39,878          | 8,598    | 4,772    |
| 60+ Female                                                                                                                                                                                                                                                                            | 1,090,461  | 39,758          | 8,320    | 5,174    |
| % literate population (6 years and above)                                                                                                                                                                                                                                             | 66.6       | 70.9            | 73.4     | 75.2     |
| <sup>1</sup> National rank of the district by literacy status                                                                                                                                                                                                                         | NA         | 25              | 17       | 11       |
| % of households with improved source of drinking water                                                                                                                                                                                                                                | 85.9       | 97.7            | 73.4     | 78.8     |
| % of solid fuel used for cooking                                                                                                                                                                                                                                                      | 75.4       | 71.3            | 92.9     | 94.6     |
| % electricity used for lighting                                                                                                                                                                                                                                                       | 66.7       | 76.1            | 28.0     | 67.4     |
| % having toilet facility                                                                                                                                                                                                                                                              | 61.6       | 63.7            | 88.2     | 75.0     |
| % Urbanization level                                                                                                                                                                                                                                                                  | 29.0       | 44.2            | 12.9     | 19.4     |
| <sup>1</sup> National literacy rate urban: 82.3% and rural: 62.5% with the eastern region, where the three study districts are located, has slightly higher (67.2%) than the national average. National literacy for older population is low: 26.2% for ages 60-64 and 20.8% for 65+. |            |                 |          |          |

Source: National Population and Housing Census 2011, Nepal

**Supplemental Table 3: Definition of a single condition and multimorbidity**

| <b>Conditions</b>            | <b>Definition<sup>1</sup></b>                                                                                      |
|------------------------------|--------------------------------------------------------------------------------------------------------------------|
| Hypertension                 | Self-reported hypertension and/or taking antihypertensive medications.                                             |
| Heart diseases               | Self-report of heart attack, angina, or “heart trouble,” or taking medications for heart diseases.                 |
| Stroke                       | Self-report of the previous stroke or taking medication for a recent episode of stroke.                            |
| Hypercholesterolemia         | Self-reported raised cholesterol and/or taking medication for hypercholesterolemia.                                |
| Diabetes                     | Self-reported diabetes and/or taking insulin or antidiabetic medications.                                          |
| Chronic respiratory diseases | Self-reported chronic respiratory diseases, asthma, COPD or taking medication for the conditions.                  |
| Chronic kidney disease       | Taking medication for chronic kidney disease or undergoing dialysis.                                               |
| Cancer                       | Taking medication for cancer; having past or current cancer therapy, including chemotherapy and radiation therapy. |
| Osteoarthritis               | Self-report of joint pain problems.                                                                                |

<sup>1</sup> Self-report was assessed by asking participants if a doctor or other health professional ever told them they had the given condition.

Supplemental Table 1. STROBE Checklist

|                           | Item No | Recommendation                                                                                                                                                                                                                                                                                                                             | Reported on                    |
|---------------------------|---------|--------------------------------------------------------------------------------------------------------------------------------------------------------------------------------------------------------------------------------------------------------------------------------------------------------------------------------------------|--------------------------------|
| <b>Title and abstract</b> | 1       | (a) Indicate the study's design with a commonly used term in the title or the abstract<br>(b) Provide in the abstract an informative and balanced summary of what was done and what was found                                                                                                                                              | Pages 1 & 2<br>Page 2          |
| <b>Introduction</b>       |         |                                                                                                                                                                                                                                                                                                                                            |                                |
| Background/rationale      | 2       | Explain the scientific background and rationale for the investigation being reported                                                                                                                                                                                                                                                       | Pages 4 & 5                    |
| Objectives                | 3       | State specific objectives, including any prespecified hypotheses                                                                                                                                                                                                                                                                           | Page 5                         |
| <b>Methods</b>            |         |                                                                                                                                                                                                                                                                                                                                            |                                |
| Study design              | 4       | Present key elements of study design early in the paper                                                                                                                                                                                                                                                                                    | Page 5                         |
| Setting                   | 5       | Describe the setting, locations, and relevant dates, including periods of recruitment, exposure, follow-up, and data collection                                                                                                                                                                                                            | Page 5                         |
| Participants              | 6       | (a) Give the eligibility criteria, and the sources and methods of selection of participants                                                                                                                                                                                                                                                | Page 5                         |
| Variables                 | 7       | Clearly define all outcomes, exposures, predictors, potential confounders, and effect modifiers. Give diagnostic criteria, if applicable                                                                                                                                                                                                   | Page 6                         |
| Data sources/ measurement | 8*      | For each variable of interest, give sources of data and details of methods of assessment (measurement). Describe comparability of assessment methods if there is more than one group                                                                                                                                                       | Page 6                         |
| Bias                      | 9       | Describe any efforts to address potential sources of bias                                                                                                                                                                                                                                                                                  | NA                             |
| Study size                | 10      | Explain how the study size was arrived at                                                                                                                                                                                                                                                                                                  | NA                             |
| Quantitative variables    | 11      | Explain how quantitative variables were handled in the analyses. If applicable, describe which groupings were chosen and why                                                                                                                                                                                                               | Page 6                         |
| Statistical methods       | 12      | (a) Describe all statistical methods, including those used to control for confounding<br>(b) Describe any methods used to examine subgroups and interactions<br>(c) Explain how missing data were addressed<br>(d) If applicable, describe analytical methods taking account of sampling strategy<br>(e) Describe any sensitivity analyses | Page 6<br>NA<br>NA<br>NA<br>NA |
| <b>Results</b>            |         |                                                                                                                                                                                                                                                                                                                                            |                                |

|                          |     |                                                                                                                                                                                                              |                  |
|--------------------------|-----|--------------------------------------------------------------------------------------------------------------------------------------------------------------------------------------------------------------|------------------|
| Participants             | 13* | (a) Report numbers of individuals at each stage of study—eg numbers potentially eligible, examined for eligibility, confirmed eligible, included in the study, completing follow-up, and analysed            | NA               |
|                          |     | (b) Give reasons for non-participation at each stage                                                                                                                                                         | NA               |
|                          |     | (c) Consider use of a flow diagram                                                                                                                                                                           | NA               |
| Descriptive data         | 14* | (a) Give characteristics of study participants (eg demographic, clinical, social) and information on exposures and potential confounders                                                                     | Page 7 & Table 1 |
|                          |     | (b) Indicate number of participants with missing data for each variable of interest                                                                                                                          | NA               |
| Outcome data             | 15* | Report numbers of outcome events or summary measures                                                                                                                                                         | Page 7 & Table 1 |
| Main results             | 16  | (a) Give unadjusted estimates and, if applicable, confounder-adjusted estimates and their precision (eg, 95% confidence interval). Make clear which confounders were adjusted for and why they were included | Page 7 & Table 2 |
|                          |     | (b) Report category boundaries when continuous variables were categorized                                                                                                                                    | Table 1          |
|                          |     | (c) If relevant, consider translating estimates of relative risk into absolute risk for a meaningful time period                                                                                             | NA               |
| Other analyses           | 17  | Report other analyses done—eg analyses of subgroups and interactions, and sensitivity analyses                                                                                                               | NA               |
| <b>Discussion</b>        |     |                                                                                                                                                                                                              |                  |
| Key results              | 18  | Summarise key results with reference to study objectives                                                                                                                                                     | Page 7           |
| Limitations              | 19  | Discuss limitations of the study, taking into account sources of potential bias or imprecision. Discuss both direction and magnitude of any potential bias                                                   | Page 9           |
| Interpretation           | 20  | Give a cautious overall interpretation of results considering objectives, limitations, multiplicity of analyses, results from similar studies, and other relevant evidence                                   | Pages 7-8        |
| Generalisability         | 21  | Discuss the generalisability (external validity) of the study results                                                                                                                                        | Page 9           |
| <b>Other information</b> |     |                                                                                                                                                                                                              |                  |
| Funding                  | 22  | Give the source of funding and the role of the funders for the present study and, if applicable,                                                                                                             | Page 1           |



1  
2  
3  
4  
5  
6  
7  
8  
9  
10  
11  
12  
13  
14  
15  
16  
17  
18  
19  
20  
21  
22  
23  
24  
25  
26  
27  
28  
29  
30  
31  
32  
33  
34  
35  
36  
37  
38  
39  
40  
41  
42  
43  
44  
45  
46  
47  
48  
49  
50  
51  
52  
53  
54  
55  
56  
57  
58  
59  
60

---

for the original study on which the present  
article is based

---

For peer review only

# BMJ Open

## Older adults with pre-existing noncommunicable conditions and their healthcare access amid COVID-19 pandemic: a cross-sectional study in eastern Nepal

|                                 |                                                                                                                                                                                                                                                                                                                                                                                                                                                                                                                                                                                                                                                                                                                    |
|---------------------------------|--------------------------------------------------------------------------------------------------------------------------------------------------------------------------------------------------------------------------------------------------------------------------------------------------------------------------------------------------------------------------------------------------------------------------------------------------------------------------------------------------------------------------------------------------------------------------------------------------------------------------------------------------------------------------------------------------------------------|
| Journal:                        | <i>BMJ Open</i>                                                                                                                                                                                                                                                                                                                                                                                                                                                                                                                                                                                                                                                                                                    |
| Manuscript ID                   | bmjopen-2021-056342.R1                                                                                                                                                                                                                                                                                                                                                                                                                                                                                                                                                                                                                                                                                             |
| Article Type:                   | Original research                                                                                                                                                                                                                                                                                                                                                                                                                                                                                                                                                                                                                                                                                                  |
| Date Submitted by the Author:   | 07-Jan-2022                                                                                                                                                                                                                                                                                                                                                                                                                                                                                                                                                                                                                                                                                                        |
| Complete List of Authors:       | Ghimire, Saruna; Miami University, Department of Sociology and Gerontology<br>Shrestha, Aman; Miami University, Department of Sociology and Gerontology<br>Yadav, Uday; Center for Research Implementation and Policy, Research and Evaluation; UNSW<br>Mistry, Sabuj Kanti; ARCED Foundation<br>Chapadia, Bunsu; Miami University, Department of Microbiology<br>Yadav, Om Prakash; Government of Nepal Ministry of Health and Population<br>Ali, ARM Mehrab; ARCED Foundation<br>Rawal, Lal; Central Queensland University, School of Health Medical and Applied Sciences<br>Yadav, Priyanka; Center for Research<br>Mehata, Suresh; Government of Nepal Ministry of Health and Population<br>Harris, Mark; UNSW |
| <b>Primary Subject Heading</b>: | Global health                                                                                                                                                                                                                                                                                                                                                                                                                                                                                                                                                                                                                                                                                                      |
| Secondary Subject Heading:      | Epidemiology, Evidence based practice, Global health, Health policy                                                                                                                                                                                                                                                                                                                                                                                                                                                                                                                                                                                                                                                |
| Keywords:                       | COVID-19, EPIDEMIOLOGY, Health policy < HEALTH SERVICES ADMINISTRATION & MANAGEMENT, Public health < INFECTIOUS DISEASES                                                                                                                                                                                                                                                                                                                                                                                                                                                                                                                                                                                           |
|                                 |                                                                                                                                                                                                                                                                                                                                                                                                                                                                                                                                                                                                                                                                                                                    |

SCHOLARONE™  
Manuscripts



I, the Submitting Author has the right to grant and does grant on behalf of all authors of the Work (as defined in the below author licence), an exclusive licence and/or a non-exclusive licence for contributions from authors who are: i) UK Crown employees; ii) where BMJ has agreed a CC-BY licence shall apply, and/or iii) in accordance with the terms applicable for US Federal Government officers or employees acting as part of their official duties; on a worldwide, perpetual, irrevocable, royalty-free basis to BMJ Publishing Group Ltd ("BMJ") its licensees and where the relevant Journal is co-owned by BMJ to the co-owners of the Journal, to publish the Work in this journal and any other BMJ products and to exploit all rights, as set out in our [licence](#).

The Submitting Author accepts and understands that any supply made under these terms is made by BMJ to the Submitting Author unless you are acting as an employee on behalf of your employer or a postgraduate student of an affiliated institution which is paying any applicable article publishing charge ("APC") for Open Access articles. Where the Submitting Author wishes to make the Work available on an Open Access basis (and intends to pay the relevant APC), the terms of reuse of such Open Access shall be governed by a Creative Commons licence – details of these licences and which [Creative Commons](#) licence will apply to this Work are set out in our licence referred to above.

Other than as permitted in any relevant BMJ Author's Self Archiving Policies, I confirm this Work has not been accepted for publication elsewhere, is not being considered for publication elsewhere and does not duplicate material already published. I confirm all authors consent to publication of this Work and authorise the granting of this licence.

# Older adults with pre-existing noncommunicable conditions and their healthcare access amid COVID-19 pandemic: a cross-sectional study in eastern Nepal

<sup>1</sup>Saruna Ghimire<sup>1</sup>, Aman Shrestha<sup>1</sup>, \*<sup>1</sup>Uday Narayan Yadav<sup>2,3</sup>, Sabuj Kanti Mistry<sup>3,4,5</sup>, Bunsu Chapadia<sup>6</sup>, Om Prakash Yadav<sup>7</sup>, ARM Mehrab Ali<sup>5</sup>, Lal B Rawal<sup>8</sup>, <sup>2</sup>Priyanka Yadav, Suresh Mehata<sup>7</sup>, Mark Fort Harris<sup>3</sup>

<sup>1</sup>Department of Sociology and Gerontology and Scripps Gerontology Center, Miami University, 45056, Oxford, OH, USA

<sup>2</sup>Center for Research, Policy and Implementation, Biratnagar 56613, Nepal

<sup>3</sup>Centre for Primary Health Care and Equity, University of New South Wales, Sydney, Australia

<sup>4</sup>BRAC James P Grant School of Public Health, BRAC University, 68 Shahid Tajuddin Ahmed Sharani, Mohakhali, Dhaka-1212, Bangladesh

<sup>5</sup>ARCED Foundation, 13/1, Pallabi, Mirpur-12, Dhaka, Bangladesh

<sup>6</sup>Department of Microbiology, Miami University, 45056, Oxford, OH, USA

<sup>7</sup>Ministry of Health and Population, Kathmandu, Nepal

<sup>8</sup>School of Health Medical and Social Sciences, College of Science and Sustainability, Central Queensland University, Sydney Campus, Australia

<sup>1</sup>Equal contribution

\*Corresponding author: Uday Narayan Yadav, Centre for Research Policy and Implementation /Centre for Primary Health Care and Equity, University of New South Wales, Sydney, Australia; E-mail: [unyadav1@gmail.com](mailto:unyadav1@gmail.com) / [u.yadav@unsw.edu.au](mailto:u.yadav@unsw.edu.au)

---

**Word Count:3170**

**Number of references: 11**

## Abstract

### Background

COVID-19 has greatly impacted older adults with pre-existing noncommunicable conditions (hereafter called pre-existing conditions) in terms of their access to essential healthcare services. Based on the theory of vertical health equity, this study investigated access to healthcare by Nepali older adults with pre-existing conditions during the COVID-19 pandemic.

### Methods

A cross-sectional study surveyed 847 randomly selected older adults ( $\geq 60$  years) in three districts of eastern Nepal. Survey questionnaires, administered by trained community health workers, collected information on participants reported difficulty obtaining routine care and medications during the pandemic, in addition to questions on demographics, socioeconomic factors, and pre-existing conditions. Cumulative scores for pre-existing conditions were recoded as no pre-existing condition, single condition, and multimorbidity for the analyses. Chi-square tests and binary logistic regressions determined inferences.

### Results

Nearly two-thirds of the participants had a pre-existing condition (43.8% single condition and 22.8% multimorbid) and reported experiencing difficulty obtaining routine care (52.8%) and medications (13.5%). Participants with single (OR: 3.06, 95%CI: 2.17-4.32) and multimorbid (OR: 5.62, 95%CI: 3.63-8.71) conditions had three and five-fold increased odds of experiencing difficulty accessing routine care. Findings were similar for difficulty obtaining medication (OR single: 3.12, 95%CI: 1.71-5.69; OR multimorbid: 3.98, 95%CI: 2.01-7.87) where odds were greater than three-folds.

### Conclusions

Older adults with pre-existing conditions in Nepal, who require routine medical care and medication, faced significant difficulties obtaining them during the pandemic, which may lead to deterioration in their pre-existing conditions. Public health emergency preparedness should incorporate plans for both managing the emergency and providing continuing care.

**Keywords:** Nepali older adults, pre-existing noncommunicable conditions, healthcare access, COVID-19.

**Strengths and limitations of this study:**

- The study is one of its first kind from Nepal to assess challenges in healthcare access amidst the pandemic among older adults with NCDs.
  - Large sample size and data collection by trained community health workers add to the reliability of the data.
  - Cross-sectional study design limits causality inferences.
  - The information on pre-existing conditions was self-reported and may be underestimated.
  - Generalizability is limited due to the inclusion of three districts from Eastern Nepal.
- 

For peer review only

## Background

In Nepal, a South Asian country nestled in the Himalayas between India and China, population aging is a relatively new yet rapidly expanding issue. Consistent with the United Nation's definition, Nepal's Senior Citizens Act [1] identified individuals aged 60 and older as senior citizens. In accordance with the global trend, Nepal has been observing a continuous decline in mortality rates and an increase in life expectancy from 54.3 to 66.6 years between 1991 to 2011 [2]. Although the overall national population growth rate is declining, that of the older population is increasing and exceeds the national average growth rate (1.4% vs. 3.1%) [2]. Furthermore, from 1991 to 2011, Nepal, in late demographic transition, has experienced a significant increase in the aging index (from 13.6 to 23.3) and median age (from 18.9 to 22.3 years), reminding the society to be prepared to address the social, economic and health needs of burgeoning Nepali older adults [2]. While population aging is an emerging and neglected topic in Nepal [3], the increased vulnerability of the older population due to the ongoing pandemic has provoked us to revisit their health needs.

Nepal experienced an epidemiological shift in terms of declining burden of communicable diseases and a growing burden of noncommunicable diseases (NCDs) in the last decade [4]. This means that a significant share of the population has been living for many years with chronic conditions, increasing the burden on Nepal's limited health resources [5]. Among older age groups (50 and older), in 2017, NCDs contributed to 55.3% of the disease burden in Nepal [6]. In addition to single NCDs, the prevalence of multimorbidity or the presence of two or more chronic conditions is increasing, both globally and in Nepal [7,8]. Multimorbidity is often more challenging than a single condition because of the synergistic impact of multiple conditions, each of which may require a multitude of specialists' referrals, biomedical investigations, and treatments [9]. Although nationwide estimates for multimorbidity are unavailable, estimates from rural parts of Eastern Nepal suggest that one in seven older adults had multimorbid chronic conditions [7].

Nepal has experienced a series of COVID-19 outbreaks; more recently, the Delta strain, which has worsened the COVID-19 situation in Nepal. As of July 6, 2021, the pandemic has claimed 9,263 lives out of 648,085 positive cases in Nepal [10]; the highest proportion of deaths (67.8%) reported among older adults (>54 years), and all the deceased older adults had at least one pre-existing condition [11]. In Nepal, cardiovascular diseases, diabetes, and respiratory illness were the most common conditions linked to COVID-19 deaths [12].

Through its commitment to Sustainable Development Goals (SDG), Nepal aims to reduce premature deaths due to NCDs by one-third by 2030 [13]. People with one or more NCDs have extensive and diverse health-related needs and require continuity of care, self-management, medication adherence, and often seek repeated and regular interactions with the health system [14]. Horizontal health equity advocates for equal access to health care. In contrast, vertical health equity is defined as the principle that advocates for access to healthcare based on an individual's needs, i.e., those with greater needs should have greater access to healthcare [15]. Since those with one or more health problems have greater health needs than those without a health condition, they should have greater access to healthcare. Moreover, the needs are even greater for those with

1  
2  
3 multimorbidity. In the context of our study, the principle of vertical health equity is violated if  
4 those with one or more pre-existing NCDs experience greater challenges to access health care.  
5

6  
7 Despite the high needs, Nepal ranks far below the average in the Universal Health Coverage index  
8 [16], meaning that individuals and communities in Nepal do not have access to quality essential  
9 health services due to financial hardship. The COVID-19 pandemic may have further jeopardized  
10 healthcare access. On one hand, the nationwide lockdown, imposed by the Nepal government as a  
11 measure of mass quarantine to contain the COVID-19, may have aggravated the risk factors for  
12 NCDs such as sedentary lifestyles, unhealthy diets, smoking, alcohol, tobacco use, lack of sleep,  
13 non-compliance to medications, etc. [17–19]. On the other hand, it has resulted in the closure of  
14 services connected to day-to-day life like transportation, markets, city centers, and general health  
15 checkups in hospitals [20]. Due to the lockdowns, people have had difficulties not just fulfilling  
16 their everyday needs but also accessing healthcare in the absence of transport services [21].  
17 Consequently, a rapid decrease in the number of per-day patient visits was noted during the  
18 lockdown [22]. Healthcare was inaccessible even pre-COVID, but at that time, it was tightly linked  
19 to income. During the COVID-19 lockdowns, even those who could afford healthcare were  
20 deprived of access [20]. Although the impact of COVID-19 is yet to be fully understood,  
21 inaccessible healthcare due to the COVID-19 pandemic may lead to a deterioration in pre-existing  
22 conditions, increase the severity of disease and disability, escalate premature deaths, and contribute  
23 to major economic loss for the country [23].  
24  
25  
26  
27

28 Previous studies from India, Bangladesh, and Hong Kong have reported difficulty accessing  
29 healthcare and/or obtaining medication during the pandemic [24–26]. Although the previous  
30 literature from Nepal has suggested disruptions in health services amidst the pandemic [20], it is  
31 unknown from patients' perspectives how much difficulty they experienced accessing healthcare  
32 amidst the pandemic. Framing the current study within the principle of vertical health equity, we  
33 aim to assess the relationships between pre-existing conditions and challenges in obtaining routine  
34 healthcare and medications during the COVID-19 pandemic among older adults in eastern Nepal.  
35  
36

## 37 **Methodology**

38  
39 This study is reported following the STROBE guidelines [27] (Supplemental Table 1).  
40

### 41 **Study design and study participants**

42  
43 This study followed a cross-sectional design and surveyed 847 randomly selected older adults  
44 between July and September 2020; further detailed elsewhere [28]. Using an unknown  
45 prevalence of 50%, 5% precision, a design effect of 2, and a non-response rate of 5.0%, the  
46 minimum required sample size was calculated to be 847. Multi-stage cluster sampling was used  
47 for selecting participants. In the first stage, the three districts of Province 1 in eastern Nepal,  
48 namely *Morang*, *Pachthar*, and *Terathum* (Figure 1), were randomly selected. While Morang lies  
49 in the southern plains, *Pachthar* and *Terathum* are hilly districts. The population and key  
50 infrastructure indicators for these districts are provided in Supplemental Table 2. Briefly, the three  
51 study districts have a higher literacy rate and access to sanitary toilets than the national average.  
52 While Morang district is above the national average in terms of urbanization and access to  
53 electricity and improved drinking water sources, the other two districts, Pachthar and Terathum,  
54  
55  
56  
57



1  
2  
3 are below the national average (Supplemental Table 2). In the second stage, one urban and one  
4 rural municipality were randomly selected in each district. Next, from each municipality, three  
5 wards (lowest administrative units in Nepal) were randomly selected, and in the final stage,  
6 participants were randomly selected from each ward. Nepali nationals who were residents in the  
7 study area for a minimum of a year and aged  $\geq 60$  years were included. Those in institutional  
8 settings and with significant hearing and communication problems that interfered with the survey  
9 were excluded.  
10  
11

### 12 **Data collection and study tools**

14 Surveyors were community health workers, certified in General Medicine, and employed by the  
15 Nepal government in the selected study areas. Surveyors received two sessions of orientations via  
16 zoom, each four hours long, on study methodology, tools, ethics, and field logistics. Following  
17 standard COVID-19 protocols implemented by national and local governments, surveyors visited  
18 households and conducted face-to-face interviews using a questionnaire implemented in the  
19 KoBoToolbox mobile app. A common group in WhatsApp was used to share and troubleshoot any  
20 field problems and to provide consistent information to all field enumerators. Initially developed  
21 in English, the study tool was translated into Nepali and pre-tested among ten older adults.  
22  
23  
24

### 25 **Study variables**

26  
27 **Dependent variable:** There were two outcome variables: whether participants faced difficulty  
28 obtaining 1) routine medical care and 2) prescribed medicines because of the COVID-19  
29 pandemic. For each item, participants expressed their level of difficulty in the four-response Likert  
30 scale ('none,' 'some,' 'very much,' 'unable'), which were then dichotomized as no difficulties or  
31 difficulties faced (responses 'some,' 'very much,' 'unable').  
32  
33

34 **Independent variables:** The main independent variable of interest was the presence of pre-  
35 existing conditions. Participants were asked if they had any pre-existing conditions diagnosed by  
36 a health professional and/or taking any prescription medications for that condition. In multiple  
37 response type questions, participants selected all the applicable conditions. Finally, via an open-  
38 ended follow-up question, they were asked to specify any other conditions that were not already  
39 captured. A cumulative score for all the conditions was calculated for each participant and was  
40 categorized into no pre-existing conditions, single condition, and multimorbidity. Definition of  
41 chronic conditions is tabulated in Supplemental Table 3.  
42  
43

44 **Covariates:** Other variables included age, sex, marital status, ethnicity, education, urban/rural  
45 residence, current occupation, living arrangement, proximity to the health center,  
46 financial hardships to access healthcare, and recipient of social security allowance. All these  
47 covariates were categorical with response levels as specified in Table 1.  
48  
49

### 50 **Patient and public involvement**

51 Patients and the public were not involved in the design of the study and interpretation of the  
52 results.  
53  
54  
55  
56  
57

## Statistical analyses

All analyses are performed separately for each of the two dependent variables: access to 1) routine care and 2) medications. Since all our variables were categorical, they are summarized in Table 1 in terms of frequencies and percentages, and the group differences were evaluated using chi-square tests. Binary logistic regression analysis assessed if participants' pre-existing conditions were associated with difficulty obtaining healthcare. A stepwise selection method, using AIC criteria, was used for model selection and started with all the covariates reported in Table 1 while only retaining, in the final model, age, ethnicity, residence, occupation, walking proximity to the nearest health center, and financial hardships with healthcare. The VIF for each variable included in the final model was below 2 suggesting no multicollinearity issues. Adjusted and unadjusted odds ratios and 95% confidence intervals are reported in Table 2. All statistical analyses were conducted using SAS 9.4.

## Results

### Participants' characteristics

Data were collected from 843 of the approached 847 participants (a response rate of 99.5%). The largest proportion of the participants were in their sixties (45.4%), male (51.1%), married (75.8%), minorities (68.4%), without formal schooling (68.4%), urban residents (56.1%), involved in agriculture (47.4%), and living with family (89.1%) (Table 1). More than half of the participants faced financial hardship (55.0%) and received social security allowances (51.5%). Only one-third of the participants were free of pre-existing NCDs conditions; 43.8% had single, and 22.8% had multiple conditions (Table 1).

More than half of the participants reported facing difficulty obtaining healthcare ( $p=52.8\%$ , 95%CI: 49.4%-56.2%), and 13.5% (95%CI: 11.2%-15.8%) reported facing difficulty obtaining medications. In bivariate analyses, among the covariates, age, ethnicity, occupation, walking proximity to the nearest health center, and financial hardships with healthcare were significantly associated with both of the outcome variables (Table 1); interestingly, only rural residents reported experiencing difficulties obtaining medications.

### Association between pre-existing conditions and difficulty obtaining healthcare and medications during COVID-19

In bivariate analysis, participants' pre-existing conditions were significantly associated with their reported difficulty getting routine healthcare and medications ( $P<0.001$ ) (Table 1). In the regression analyses (Table 2), participants' pre-existing condition was significantly associated with difficulty obtaining healthcare and medications in both adjusted and unadjusted models. Notably, the strength of the association was greater for those with multimorbidity than those with single conditions. After adjusting for the covariates, compared to participants without any pre-existing conditions, those with single (OR: 3.06, 95%CI: 2.17-4.32) and multiple (OR: 5.62, 95%CI: 3.63-8.71) conditions respectively had about three times and six times higher odds of experiencing difficulties in obtaining routine healthcare. Likewise, for medications, those with single (OR: 3.12, 95%CI: 1.71-5.69) and multiple (OR: 3.98, 95%CI: 2.01-7.87) conditions had

1  
2  
3 more than three times increased odds of experiencing difficulties in obtaining medications (Table  
4 2).  
5

## 6 **Discussion**

7  
8 This study found a significant positive association between participants' pre-existing conditions  
9 and difficulty obtaining both routine healthcare and medications during the COVID-19 pandemic  
10 in three studied districts of eastern Nepal. Those with multiple conditions were even more likely  
11 to experience difficulty accessing healthcare than those with single conditions despite their likely  
12 increased need.  
13  
14

15 Although people with pre-existing conditions require routine medical checkups and medication,  
16 both during and after the pandemic, our participants faced significant difficulty obtaining them.  
17 This study is the first of its kind in Nepal, and a similar study is unavailable for direct comparison.  
18 However, our findings align with studies conducted in India [25] and Hong Kong [24] among the  
19 general population and Bangladesh among the older population [26], which also reported  
20 significant challenges faced by those with pre-existing conditions to access healthcare during the  
21 pandemic. In India, participants missed follow-up visits, and experienced difficulty in medication  
22 procurement, resulting in a worsening of pre-existing symptoms [29].  
23  
24

25 Acknowledging that inaccessible healthcare is a long-term problem in Nepal, existent even prior  
26 to the COVID-19 pandemic, several factors, at both the micro and macro levels, help explain why  
27 healthcare was not easily accessible to our participants. We believe the restricted movement and  
28 cessation of public transportation, imposed as part of the nationwide lockdown, to be the most  
29 important barrier to access. As a preventive measure to curb the spread of the virus, Nepal's  
30 government imposed several intermittent nationwide lockdowns of varying lengths. In a country  
31 where the majority rely on public transportation and a private vehicle is a privilege enjoyed only  
32 by the rich, cessation of public transportation meant that people with existing conditions had no  
33 means to reach health facilities, especially in rural areas where facilities are distant. In the current  
34 pandemic, it is obvious that an ill-equipped health system may not have been able to maintain  
35 essential services because of limited human resources for health (HRH) or shifting of HRH from  
36 primary healthcare (PHC) to COVID-19 management centers/hospitals. Furthermore, there were  
37 reported interruptions in health service delivery amidst the pandemic [23] due to the closure of  
38 peripheral healthcare facilities (such as PHCs, health posts) and fears of COVID-19 transmission  
39 among healthcare workers [20,23]. A rapid assessment of 163 countries by the World Health  
40 Organization on the impact of the COVID-19 pandemic on NCDs resources and services revealed  
41 a considerable disruption to NCDs services in many countries, and in some South Asian countries,  
42 the government funds for NCDs were reallocated to COVID-19 treatment and management [23].  
43  
44  
45

46 The pandemic has been overwhelming, but we know that its impact is likely to wane over the next  
47 few years. So, what are the implications of our findings beyond the COVID-19 pandemic? The  
48 broader implications of our findings should be contextualized within the context of historical,  
49 contemporary, and inevitable future outbreaks and public health emergencies. Although "We are  
50 all in this together" was a highly popularized phrase during the pandemic, evidence suggests  
51 significant inequalities in severe morbidity and mortality during a pandemic, whereby certain age  
52 groups, minorities, and those with low socioeconomic status bear the greater impact, as noted  
53 during the 1918 Spanish influenza pandemic, the 2009 H1N1 outbreak, and the current COVID-  
54  
55  
56  
57

1  
2  
3 19 pandemic [30,31]. The noted disparities, on the grounds of social determinants of health, point  
4 to the gaps in our emergency preparedness and the failure of society to protect the most vulnerable  
5 in a time of catastrophe.  
6

7  
8 Although focusing on curative and preventive strategies to curb the pandemic is important, it  
9 should be noted that health systems have dual responsibilities in both responding to the outbreak  
10 as well as providing essential health services, especially to those with greater needs, such as older  
11 adults with NCDs. As demonstrated by previous [32,33] and current studies, the latter was  
12 neglected in many countries, thus depriving people with NCDs of access to continuing care and  
13 essential medications. Acknowledging that Nepal Government has provisions to provide universal  
14 health care and essential medicines, at the policy level, Nepal's COVID-19 response plan has no  
15 specific prioritization and provisions for either older adults and/or people with NCDs [34].  
16 Policymakers in Nepal should recognize that the impact of the COVID-19 pandemic can only be  
17 mitigated if strategies to provide essential routine services to their vulnerable population are in  
18 place. These strategies should be informed by epidemiological data, health system capacity, and  
19 available resources during health crises. Given the disruption of healthcare access during the  
20 COVID-19 pandemic, there is a need to co-design and evaluate new models of care with the  
21 engagement of key stakeholders, citizens, local developmental partners, and decision-makers.  
22 These models of care should be designed in a way that it can meet the health needs of the  
23 population during and beyond the pandemic. One important strategy is putting PHC at the center  
24 of an emergency response plan to address the healthcare needs at the community level. There is an  
25 opportunity to focus on developing alternative pathways to deliver health services and essential  
26 drugs such as door-to-door services, mobilizing community health workers, expanding telehealth  
27 or mobile health, and remote health consultations [23].  
28  
29  
30

### 31 **Strength, limitations, and generalizability of the findings**

  
32

33 This study is one of its first kind from Nepal to assess challenges to healthcare access amidst the  
34 pandemic among older adults with NCDs. Large sample size, the inclusion of both urban and rural  
35 areas, and data collection by trained community health workers add to the reliability of the data.  
36 However, this study also has some limitations. The first is that due to the cross-sectional study  
37 design, it is not possible to infer causality. However, the questionnaire did ask respondents to  
38 respond to questions with reference to “compared to before COVID” and “due to COVID”; thus,  
39 the responses reflected their view of changes that had occurred. The information on pre-existing  
40 conditions was self-reported, and we believe it to be underestimated because, in the Nepali context,  
41 it is common to access healthcare only when the symptoms are obvious and severe. Hence, many  
42 of our participants may not be aware of their sub-clinical conditions, which may have introduced  
43 misclassification bias in the measurements, thereby underestimating the true burden of pre-existing  
44 conditions. The study includes a large proportion of participants from a minority background and  
45 does not represent the general Nepali population, thus limiting the generalizability of study  
46 findings. Additionally, the study districts are in hills and plain areas of eastern Nepal, and thus the  
47 findings may not be generalizable to other settings of Nepal. Our study did not assess reasons for  
48 access problems, and future studies, employing a mixed-method approach, should explore the  
49 underlying reasons for inaccessibility.  
50  
51  
52  
53  
54  
55  
56  
57  
58  
59  
60

## Conclusions

Nepali older adults with one or more pre-existing conditions, despite their higher health needs, faced more difficulties obtaining routine healthcare and medications during the COVID-19 pandemic, which is against the principle of vertical health inequity. Policymakers, healthcare practitioners, and local stakeholders should be cognizant of the existing inequality in healthcare and urgently address the gaps in healthcare accessibility for older adults with NCDs. The broader consequences of inaccessible healthcare during the pandemic and its subsequent impact on Nepal's commitment to the attainment of SDG-3 of reducing NCDs burden by one-third by 2030 [13] is yet to be fully understood. Yet, the pandemic reminds us to revisit our national emergency preparedness and revise future planning using a more holistic approach, addressing both emerging and existing healthcare needs.

## Declarations

The authors received no financial support for the research or publication of this article and have no conflict of interests to declare regarding the publication of this paper.

## Ethical approval

Nepal Health Research Council approved the original study, and the Institutional Review Board at Miami University exempted this secondary data analysis. Participants provided written consent prior to data collection. For participants unable to read and write, a guardian provided proxy written consent.

## Author's contribution

UNY, SG,SKM and MFH conceived the idea. UNY,OPY ,SKM and SM collected the data. SG,AS,BC and UNY analyzed the data. SG, AS ,BC, SKM ,PY and UNY drafted the first draft. AMA,LBR,SKM and MFH provided significant scientific inputs in improving the quality of paper.All authors contributed significantly and approved the final version.

**Data availability:** All data relevant to the study are included in the article or uploaded as supplementary information.

**Funding :** The study did not receive any funding to conduct this research work.

## References

1. Nepal Law Commission. *Senior Citizens Act, 2063 (2006)*. Kathmandu, 2006.
2. Nepal ed. *Population Monograph of Nepal*. Kathmandu: Government of Nepal, National Planning Commission Secretariat, Central Bureau of Statistics, 2014.
3. Shrestha L. Geriatric health in Nepal: Concerns and experience. *Nepal Medical College Journal* 2013;**15**:148–52.
4. Sharma SR, Page R, Matheson A *et al*. Non-communicable disease prevention in Nepal: Systemic challenges and future directions. *Global Health Promotion* 2019;**26**:94–7.

- 1  
2  
3 5. Mishra SR, Shrestha N, Gyawali B *et al*. *The Changing Patterns of Non-Communicable*  
4 *Diseases and Injuries in Nepal from 1990-2017: A Review of Evidence from Global Burden of*  
5 *Disease Study 2017*. In Review, 2020.  
6
- 7 6. Roser M, Ritchie H. Burden of Disease. *Our World in Data* 2016.  
8
- 9 7. Yadav UN, Ghimire S, Mistry SK *et al*. Prevalence of non-communicable chronic conditions,  
10 multimorbidity and its correlates among older adults in rural Nepal: A cross-sectional study.  
11 *BMJ Open* 2021;**11**:e041728.  
12
- 13 8. Souza DLB, Oliveras-Fabregas A, Minobes-Molina E *et al*. Trends of multimorbidity in 15  
14 European countries: a population-based study in community-dwelling adults aged 50 and over.  
15 *BMC Public Health* 2021;**21**:76.  
16
- 17 9. Marengoni A, Angleman S, Melis R *et al*. Aging with multimorbidity: A systematic review of  
18 the literature. *Ageing Research Reviews* 2011;**10**:430–9.  
19
- 20 10. Ministry of Health and Population, Nepal. COVID19-Dashboard. Available at:  
21 <https://covid19.mohp.gov.np/>.  
22
- 23 11. Rayamajhee B, Pokhrel A, Syangtan G *et al*. How well the government of Nepal is  
24 responding to covid-19? An experience from a resource-limited country to confront  
25 unprecedented pandemic. *Front Public Health* 2021;**9**:597808.  
26
- 27 12. Panthee B, Dhungana S, Panthee N *et al*. Clinical and epidemiological features of COVID-19  
28 deaths in Nepal. *New Microbes and New Infections* 2020;**38**:100797.  
29
- 30 13. United Nations. *Transforming Our World: The 2030 Agenda for Sustainable Development*.  
31  
32
- 33 14. Hopman P, Schellevis FG, Rijken M. Health-related needs of people with multiple chronic  
34 diseases: differences and underlying factors. *Qual Life Res* 2016;**25**:651–60.  
35
- 36 15. O'Donnell O, van Doorslaer E, Wagstaff A *et al*. *Analyzing Health Equity Using Household*  
37 *Survey Data: A Guide to Techniques and Their Implementation*. The World Bank, 2007.  
38
- 39 16. World Health Organization. *World Health Statistics 2019: Monitoring Health for the SDGs :*  
40 *Sustainable Development Goals.*, 2019.  
41
- 42 17. Yadav UN, Rayamajhee B, Mistry SK *et al*. A syndemic perspective on the management of  
43 non-communicable diseases amid the covid-19 pandemic in low- and middle-income countries.  
44 *Front Public Health* 2020;**8**:508.  
45
- 46 18. Gupta SK, Lakshmi PVM, Kaur M *et al*. Role of self-care in COVID-19 pandemic for people  
47 living with comorbidities of diabetes and hypertension. *Journal of Family Medicine and Primary*  
48 *Care* 2020;**9**:5495–501.  
49
- 50 19. Kluge HHP, Wickramasinghe K, Rippin HL *et al*. Prevention and control of non-  
51 communicable diseases in the COVID-19 response. *The Lancet* 2020;**395**:1678–80.  
52  
53

- 1  
2  
3 20. Singh DR, Sunuwar DR, Shah SK *et al.* Impact of COVID-19 on health services utilization  
4 in Province-2 of Nepal: A qualitative study among community members and stakeholders. *BMC*  
5 *health services research* 2021;**21**:174.  
6  
7 21. Amatya Y, Douglas AH, Gurung ND *et al.* Barriers to accessing healthcare during COVID-  
8 19 lockdown: A point prevalence study amongst patients attending emergency and general out-  
9 patient clinics of patan hospital, Nepal. *Open Access Journal of Public Health*.  
10  
11 22. Kc A, Gurung R, Kinney MV *et al.* Effect of the COVID-19 pandemic response on  
12 intrapartum care, stillbirth, and neonatal mortality outcomes in Nepal: A prospective  
13 observational study. *The Lancet Global Health* 2020;**8**:e1273–81.  
14  
15 23. World Health Organization. *The Impact of the COVID-19 Pandemic on Noncommunicable*  
16 *Disease Resources and Services: Results of a Rapid Assessment*. Geneva: World Health  
17 Organization, 2020.  
18  
19 24. Chan EYY, Kim JH, Lo ESK *et al.* What happened to people with non-communicable  
20 diseases during covid-19: Implications of H-EDRM policies. *International Journal of*  
21 *Environmental Research and Public Health* 2020;**17**:E5588.  
22  
23 25. Pati S, Mahapatra P, Kanungo S *et al.* Managing multimorbidity (multiple chronic diseases)  
24 amid covid-19 pandemic: a community based study from Odisha, India. *Frontiers in Public*  
25 *Health* 2020;**8**:584408.  
26  
27 26. Mistry SK, Ali AM, Yadav UN *et al.* Older adults with non-communicable chronic  
28 conditions and their health care access amid COVID-19 pandemic in Bangladesh: Findings from  
29 a cross-sectional study.  
30  
31 27. Von Elm E, Altman DG, Egger M *et al.* The strengthening the reporting of observational  
32 studies in epidemiology (strobe) statement: Guidelines for reporting observational studies.  
33 *Epidemiology* 2007;**18**:800–4.  
34  
35 28. Yadav U, Yadav OP, Singh DR *et al.* Perceived fear of covid-19 and its associated factors  
36 among Nepalese older adults in eastern Nepal: Findings from a cross-sectional study. 2020, DOI:  
37 10.21203/rs.3.rs-125117/v1.  
38  
39 29. Gummidi B, John O, Jha V. Continuum of care for non-communicable diseases during  
40 COVID-19 pandemic in rural India: A mixed methods study. *Journal of Family Medicine and*  
41 *Primary Care* 2020;**9**:6012–7.  
42  
43 30. Marmot M, Allen J. COVID-19: Exposing and amplifying inequalities. *Journal of*  
44 *Epidemiology and Community Health* 2020;**74**:681–2.  
45  
46 31. Bamba C, Riordan R, Ford J *et al.* The COVID-19 pandemic and health inequalities.  
47 *Journal of Epidemiology and Community Health* 2020;**74**:964–8.  
48  
49  
50  
51  
52  
53  
54  
55  
56  
57  
58  
59  
60

1  
2  
3 32. Chudasama YV, Gillies CL, Zaccardi F *et al.* Impact of COVID-19 on routine care for  
4 chronic diseases: A global survey of views from healthcare professionals. *Diabetes & Metabolic*  
5 *Syndrome* 2020;**14**:965–7.  
6

7  
8 33. Saqib MAN, Siddiqui S, Qasim M *et al.* Effect of COVID-19 lockdown on patients with  
9 chronic diseases. *Diabetes & Metabolic Syndrome* 2020;**14**:1621–3.  
10

11 34. , Ministry of Health and Population, Government of Nepal. Health sector emergency  
12 response plan: COVID-19 Pandemic. 2020.  
13  
14  
15  
16  
17  
18  
19  
20  
21  
22  
23  
24  
25  
26  
27  
28  
29  
30  
31  
32  
33  
34  
35  
36  
37  
38  
39  
40  
41  
42  
43  
44  
45  
46  
47  
48  
49  
50  
51  
52  
53  
54  
55  
56  
57  
58  
59  
60

For peer review only



**Table 1. Characteristics of the study participants- overall and by their experiences in obtaining healthcare during the COVID-19 pandemic.**

|                                                       | Overall n (%)<br>(N=843) | Difficulty obtaining healthcare n (%) |                      |                          | Difficulty obtaining medications n (%) |                      |                      |
|-------------------------------------------------------|--------------------------|---------------------------------------|----------------------|--------------------------|----------------------------------------|----------------------|----------------------|
|                                                       |                          | Yes<br>(n=445, 52.8%)                 | No<br>(n=398, 47.2%) | <sup>1</sup> p-<br>Value | Yes<br>(n=114, 13.5%)                  | No<br>(n=729, 86.5%) | <sup>1</sup> p-Value |
| <b>Age in years</b>                                   |                          |                                       |                      |                          |                                        |                      |                      |
| 60-69                                                 | 383 (45.4)               | 164 (36.9)                            | 219 (55.0)           | <0.001                   | 35 (30.7)                              | 348 (47.7)           | 0.001                |
| 70-79                                                 | 315 (37.4)               | 189 (42.5)                            | 126 (31.7)           |                          | 59 (51.8)                              | 256 (35.1)           |                      |
| 80+                                                   | 145 (17.2)               | 92 (20.7)                             | 53 (13.3)            |                          | 20 (17.5)                              | 125 (17.1)           |                      |
| <b>Sex</b>                                            |                          |                                       |                      |                          |                                        |                      |                      |
| Female                                                | 412 (48.9)               | 229 (51.5)                            | 183 (46.0)           | 0.112                    | 44 (38.6)                              | 368 (50.5)           | 0.018                |
| Male                                                  | 431 (51.1)               | 216 (48.5)                            | 215 (54.0)           |                          | 70 (61.4)                              | 361 (49.5)           |                      |
| <b><sup>2</sup>Marital status</b>                     |                          |                                       |                      |                          |                                        |                      |                      |
| Married                                               | 639 (75.8)               | 321 (72.1)                            | 318 (79.9)           | 0.009                    | 93 (81.6)                              | 546 (74.9)           | 0.121                |
| Without partner                                       | 204 (24.2)               | 124 (27.9)                            | 80 (20.1)            |                          | 21 (18.4)                              | 183 (25.1)           |                      |
| <b>Ethnicity</b>                                      |                          |                                       |                      |                          |                                        |                      |                      |
| Brahmins/Chhetri                                      | 266 (31.6)               | 159 (35.7)                            | 107 (26.9)           | 0.006                    | 18 (15.8)                              | 248 (34.0)           | <0.001               |
| Minorities and others                                 | 577 (68.4)               | 286 (64.3)                            | 291 (73.1)           |                          | 96 (84.2)                              | 481 (66.0)           |                      |
| <b>Education</b>                                      |                          |                                       |                      |                          |                                        |                      |                      |
| No formal schooling                                   | 577 (68.4)               | 298 (67.0)                            | 279 (70.1)           | 0.328                    | 70 (61.4)                              | 507 (69.5)           | 0.082                |
| Formal schooling                                      | 266 (31.6)               | 147 (33.0)                            | 119 (29.9)           |                          | 44 (38.6)                              | 222 (30.5)           |                      |
| <b>Residence</b>                                      |                          |                                       |                      |                          |                                        |                      |                      |
| Rural                                                 | 370 (43.9)               | 204 (45.8)                            | 166 (41.7)           | 0.227                    | 114 (100.0)                            | 256 (35.1)           | NA                   |
| Urban                                                 | 473 (56.1)               | 241 (54.2)                            | 232 (58.3)           |                          | 0                                      | 473 (64.9)           |                      |
| <b>Current occupation</b>                             |                          |                                       |                      |                          |                                        |                      |                      |
| Agriculture                                           | 400 (47.4)               | 231 (51.9)                            | 169 (42.5)           | 0.001                    | 88 (77.2)                              | 312 (42.8)           | <0.001               |
| Non-agriculture                                       | 169 (20.0)               | 68 (15.3)                             | 101 (25.4)           |                          | 12 (10.5)                              | 157 (21.5)           |                      |
| Housewife/Retired                                     | 274 (32.5)               | 146 (32.8)                            | 128 (32.2)           |                          | 14 (12.3)                              | 260 (35.7)           |                      |
| <b>Living arrangement</b>                             |                          |                                       |                      |                          |                                        |                      |                      |
| Live alone                                            | 92 (10.9)                | 51 (11.5)                             | 41 (10.3)            | 0.590                    | 11 (9.6)                               | 81 (11.1)            | 0.642                |
| Live with family                                      | 751 (89.1)               | 394 (88.5)                            | 357 (89.7)           |                          | 103 (90.4)                             | 648 (88.9)           |                      |
| <b>Walking proximity to the nearest health center</b> |                          |                                       |                      |                          |                                        |                      |                      |
| < 30 minutes                                          | 272 (32.3)               | 124 (27.9)                            | 148 (37.2)           | 0.006                    | 41 (36.0)                              | 231 (31.7)           | 0.000                |
| 30-60 minutes                                         | 372 (44.1)               | 201 (45.2)                            | 171 (43.0)           |                          | 32 (28.1)                              | 340 (46.6)           |                      |
| > 60 minutes                                          | 199 (23.6)               | 120 (27.0)                            | 79 (19.8)            |                          | 41 (36.0)                              | 158 (21.7)           |                      |
| <b>Financial hardships with healthcare</b>            |                          |                                       |                      |                          |                                        |                      |                      |
| No                                                    | 379 (45.0)               | 184 (41.3)                            | 195 (49.0)           | 0.026                    | 65 (57.0)                              | 314 (43.1)           | 0.005                |
| Yes                                                   | 464 (55.0)               | 261 (58.7)                            | 203 (51.0)           |                          | 49 (43.0)                              | 415 (56.9)           |                      |

|                                                   |            |            |            |        |           |            |        |  |
|---------------------------------------------------|------------|------------|------------|--------|-----------|------------|--------|--|
| <b>Receiving social security allowance</b>        |            |            |            |        |           |            |        |  |
| No                                                | 409 (48.5) | 185 (41.6) | 224 (56.3) | <0.001 | 51 (44.7) | 358 (49.1) | 0.385  |  |
| Yes                                               | 434 (51.5) | 260 (58.4) | 174 (43.7) |        | 63 (55.3) | 371 (50.9) |        |  |
| <b><sup>3</sup>Pre-existing (NCDs) conditions</b> |            |            |            |        |           |            |        |  |
| None                                              | 282 (33.5) | 84 (18.9)  | 198 (49.7) | <0.001 | 17 (14.9) | 265 (36.4) | <0.001 |  |
| Single condition                                  | 369 (43.8) | 220 (49.4) | 149 (37.4) |        | 60 (52.6) | 309 (42.4) |        |  |
| Multimorbidity                                    | 192 (22.8) | 141 (31.7) | 51 (12.8)  |        | 37 (32.5) | 155 (21.3) |        |  |

<sup>1</sup>P-values from a chi-square test comparing participants experiencing and not experiencing difficulty.

<sup>2</sup>Includes widowed, separated, and never married. <sup>3</sup>NCDs= Non-communicable diseases.

**Table 2. Association between pre-existing (NCDs) conditions and difficulty obtaining healthcare and medications**

|                                                   | Difficulty obtaining healthcare |                                     | Difficulty obtaining medications |                                     |
|---------------------------------------------------|---------------------------------|-------------------------------------|----------------------------------|-------------------------------------|
|                                                   | Unadjusted<br>OR (95%CI)        | <sup>a</sup> Adjusted<br>OR (95%CI) | Unadjusted<br>OR (95%CI)         | <sup>b</sup> Adjusted<br>OR (95%CI) |
| <b><sup>1</sup>Pre-existing (NCDs) conditions</b> |                                 |                                     |                                  |                                     |
| None                                              | Reference                       |                                     | Reference                        |                                     |
| Single condition                                  | <b>3.48 (2.50 - 4.84)</b>       | <b>3.06 (2.17 - 4.32)</b>           | <b>3.03 (1.72 - 5.31)</b>        | <b>3.12 (1.71 - 5.69)</b>           |
| Multimorbidity                                    | <b>6.52 (4.33 - 9.81)</b>       | <b>5.62 (3.63 - 8.71)</b>           | <b>3.72 (2.03 - 6.83)</b>        | <b>3.98 (2.01 - 7.87)</b>           |

<sup>1</sup>NCDs= Non-communicable diseases. Statistically significant odds ratios are bolded.

<sup>a</sup>Adjusted for age, ethnicity, residence, occupation, walking proximity to the nearest health center, and financial hardships with healthcare .

<sup>b</sup>Adjusted for age, ethnicity, occupation, walking proximity to the nearest health center, and financial hardships with healthcare .

1  
2  
3  
4  
5  
6  
7  
8  
9  
10  
11  
12  
13  
14  
15  
16  
17  
18  
19  
20  
21  
22  
23  
24  
25  
26  
27  
28  
29  
30  
31  
32  
33  
34  
35  
36  
37  
38  
39  
40  
41  
42  
43  
44  
45  
46  
47  
48  
49  
50  
51  
52  
53  
54  
55  
56  
57  
58  
59  
60

**Figure 1. Map of Nepal highlighting the three study districts in the eastern region.**

For peer review only



Figure 1. Map of Nepal highlighting the three study districts in the eastern region.

**Supplemental Table 1. STROBE Checklist**

|                              | <b>Item No</b> | <b>Recommendation</b>                                                                                                                                                                         | <b>Reported on</b>    |
|------------------------------|----------------|-----------------------------------------------------------------------------------------------------------------------------------------------------------------------------------------------|-----------------------|
| <b>Title and abstract</b>    | 1              | (a) Indicate the study's design with a commonly used term in the title or the abstract<br>(b) Provide in the abstract an informative and balanced summary of what was done and what was found | Pages 1 & 2<br>Page 2 |
| <b>Introduction</b>          |                |                                                                                                                                                                                               |                       |
| Background/rationale         | 2              | Explain the scientific background and rationale for the investigation being reported                                                                                                          | Pages 4 & 5           |
| Objectives                   | 3              | State specific objectives, including any prespecified hypotheses                                                                                                                              | Page 5                |
| <b>Methods</b>               |                |                                                                                                                                                                                               |                       |
| Study design                 | 4              | Present key elements of study design early in the paper                                                                                                                                       | Page 5                |
| Setting                      | 5              | Describe the setting, locations, and relevant dates, including periods of recruitment, exposure, follow-up, and data collection                                                               | Page 5                |
| Participants                 | 6              | (a) Give the eligibility criteria, and the sources and methods of selection of participants                                                                                                   | Page 5                |
| Variables                    | 7              | Clearly define all outcomes, exposures, predictors, potential confounders, and effect modifiers. Give diagnostic criteria, if applicable                                                      | Page 6                |
| Data sources/<br>measurement | 8*             | For each variable of interest, give sources of data and details of methods of assessment (measurement). Describe comparability of assessment methods if there is more than one group          | Page 6                |
| Bias                         | 9              | Describe any efforts to address potential sources of bias                                                                                                                                     | NA                    |
| Study size                   | 10             | Explain how the study size was arrived at                                                                                                                                                     | NA                    |
| Quantitative variables       | 11             | Explain how quantitative variables were handled in the analyses. If applicable, describe which groupings were chosen and why                                                                  | Page 6                |
| Statistical methods          | 12             | (a) Describe all statistical methods, including those used to control for confounding                                                                                                         | Page 6                |
|                              |                | (b) Describe any methods used to examine subgroups and interactions                                                                                                                           | NA                    |
|                              |                | (c) Explain how missing data were addressed                                                                                                                                                   | NA                    |
|                              |                | (d) If applicable, describe analytical methods taking account of sampling strategy                                                                                                            | NA                    |
|                              |                | (e) Describe any sensitivity analyses                                                                                                                                                         | NA                    |
| <b>Results</b>               |                |                                                                                                                                                                                               |                       |

|                          |     |                                                                                                                                                                                                              |                  |
|--------------------------|-----|--------------------------------------------------------------------------------------------------------------------------------------------------------------------------------------------------------------|------------------|
| Participants             | 13* | (a) Report numbers of individuals at each stage of study—eg numbers potentially eligible, examined for eligibility, confirmed eligible, included in the study, completing follow-up, and analysed            | NA               |
|                          |     | (b) Give reasons for non-participation at each stage                                                                                                                                                         | NA               |
|                          |     | (c) Consider use of a flow diagram                                                                                                                                                                           | NA               |
| Descriptive data         | 14* | (a) Give characteristics of study participants (eg demographic, clinical, social) and information on exposures and potential confounders                                                                     | Page 7 & Table 1 |
|                          |     | (b) Indicate number of participants with missing data for each variable of interest                                                                                                                          | NA               |
| Outcome data             | 15* | Report numbers of outcome events or summary measures                                                                                                                                                         | Page 7 & Table 1 |
| Main results             | 16  | (a) Give unadjusted estimates and, if applicable, confounder-adjusted estimates and their precision (eg, 95% confidence interval). Make clear which confounders were adjusted for and why they were included | Page 7 & Table 2 |
|                          |     | (b) Report category boundaries when continuous variables were categorized                                                                                                                                    | Table 1          |
|                          |     | (c) If relevant, consider translating estimates of relative risk into absolute risk for a meaningful time period                                                                                             | NA               |
| Other analyses           | 17  | Report other analyses done—eg analyses of subgroups and interactions, and sensitivity analyses                                                                                                               | NA               |
| <b>Discussion</b>        |     |                                                                                                                                                                                                              |                  |
| Key results              | 18  | Summarise key results with reference to study objectives                                                                                                                                                     | Page 7           |
| Limitations              | 19  | Discuss limitations of the study, taking into account sources of potential bias or imprecision. Discuss both direction and magnitude of any potential bias                                                   | Page 9           |
| Interpretation           | 20  | Give a cautious overall interpretation of results considering objectives, limitations, multiplicity of analyses, results from similar studies, and other relevant evidence                                   | Pages 7-8        |
| Generalisability         | 21  | Discuss the generalisability (external validity) of the study results                                                                                                                                        | Page 9           |
| <b>Other information</b> |     |                                                                                                                                                                                                              |                  |
| Funding                  | 22  | Give the source of funding and the role of the funders for the present study and, if applicable,                                                                                                             | Page 1           |

1  
2  
3  
4  
5  
6  
7  
8  
9  
10  
11  
12  
13  
14  
15  
16  
17  
18  
19  
20  
21  
22  
23  
24  
25  
26  
27  
28  
29  
30  
31  
32  
33  
34  
35  
36  
37  
38  
39  
40  
41  
42  
43  
44  
45  
46  
47  
48  
49  
50  
51  
52  
53  
54  
55  
56  
57  
58  
59  
60

---

for the original study on which the present  
article is based

---

For peer review only

**Supplemental Table 2: Demographic and socioeconomic characteristics of study districts**

| Attributes                                                                                                                                                                                                                                                                            | National   | Study districts |          |          |
|---------------------------------------------------------------------------------------------------------------------------------------------------------------------------------------------------------------------------------------------------------------------------------------|------------|-----------------|----------|----------|
|                                                                                                                                                                                                                                                                                       |            | Morang          | Pachthar | Terathum |
| Total Population                                                                                                                                                                                                                                                                      | 26,494,504 | 965,370         | 191,817  | 101,577  |
| 60+ Population                                                                                                                                                                                                                                                                        | 2,154,410  | 79,636          | 16,918   | 9,946    |
| 60+ Male                                                                                                                                                                                                                                                                              | 1,063,949  | 39,878          | 8,598    | 4,772    |
| 60+ Female                                                                                                                                                                                                                                                                            | 1,090,461  | 39,758          | 8,320    | 5,174    |
| % literate population (6 years and above)                                                                                                                                                                                                                                             | 66.6       | 70.9            | 73.4     | 75.2     |
| <sup>1</sup> National rank of the district by literacy status                                                                                                                                                                                                                         | NA         | 25              | 17       | 11       |
| % of households with improved source of drinking water                                                                                                                                                                                                                                | 85.9       | 97.7            | 73.4     | 78.8     |
| % of solid fuel used for cooking                                                                                                                                                                                                                                                      | 75.4       | 71.3            | 92.9     | 94.6     |
| % electricity used for lighting                                                                                                                                                                                                                                                       | 66.7       | 76.1            | 28.0     | 67.4     |
| % having toilet facility                                                                                                                                                                                                                                                              | 61.6       | 63.7            | 88.2     | 75.0     |
| % Urbanization level                                                                                                                                                                                                                                                                  | 29.0       | 44.2            | 12.9     | 19.4     |
| <sup>1</sup> National literacy rate urban: 82.3% and rural: 62.5% with the eastern region, where the three study districts are located, has slightly higher (67.2%) than the national average. National literacy for older population is low: 26.2% for ages 60-64 and 20.8% for 65+. |            |                 |          |          |

Source: National Population and Housing Census 2011, Nepal



**Supplemental Table 3: Definition of a single condition and multimorbidity**

| <b>Conditions</b>            | <b>Definition<sup>1</sup></b>                                                                                      |
|------------------------------|--------------------------------------------------------------------------------------------------------------------|
| Hypertension                 | Self-reported hypertension and/or taking antihypertensive medications.                                             |
| Heart diseases               | Self-report of heart attack, angina, or “heart trouble,” or taking medications for heart diseases.                 |
| Stroke                       | Self-report of the previous stroke or taking medication for a recent episode of stroke.                            |
| Hypercholesterolemia         | Self-reported raised cholesterol and/or taking medication for hypercholesterolemia.                                |
| Diabetes                     | Self-reported diabetes and/or taking insulin or antidiabetic medications.                                          |
| Chronic respiratory diseases | Self-reported chronic respiratory diseases, asthma, COPD or taking medication for the conditions.                  |
| Chronic kidney disease       | Taking medication for chronic kidney disease or undergoing dialysis.                                               |
| Cancer                       | Taking medication for cancer; having past or current cancer therapy, including chemotherapy and radiation therapy. |
| Osteoarthritis               | Self-report of joint pain problems.                                                                                |

<sup>1</sup> Self-report was assessed by asking participants if a doctor or other health professional ever told them they had the given condition.
