# Supplementary material for: Older adults with pre-existing noncommunicable conditions and their healthcare access amid COVID-19 pandemic: a cross-sectional study in eastern Nepal
Source: PubMed Central journal article supplement — BMJ Open. 2022 Feb 3;12(2):e056342. doi: 10.1136/bmjopen-2021-056342 (PMC8814747; doi:10.1136/bmjopen-2021-056342), 2022-02-03
Supplement: bmjopen-2021-056342supp001.pdf [file bmjopen-2021-056342supp001.pdf]

**Supplemental Table 2: Demographic and socioeconomic characteristics of study districts**

| Attributes                                                                                                                                                                                                                                                                            | National   | Study districts |          |          |
|---------------------------------------------------------------------------------------------------------------------------------------------------------------------------------------------------------------------------------------------------------------------------------------|------------|-----------------|----------|----------|
|                                                                                                                                                                                                                                                                                       |            | Morang          | Pachthar | Terathum |
| Total Population                                                                                                                                                                                                                                                                      | 26,494,504 | 965,370         | 191,817  | 101,577  |
| 60+ Population                                                                                                                                                                                                                                                                        | 2,154,410  | 79,636          | 16,918   | 9,946    |
| 60+ Male                                                                                                                                                                                                                                                                              | 1,063,949  | 39,878          | 8,598    | 4,772    |
| 60+ Female                                                                                                                                                                                                                                                                            | 1,090,461  | 39,758          | 8,320    | 5,174    |
| % literate population (6 years and above)                                                                                                                                                                                                                                             | 66.6       | 70.9            | 73.4     | 75.2     |
| <sup>1</sup> National rank of the district by literacy status                                                                                                                                                                                                                         | NA         | 25              | 17       | 11       |
| % of households with improved source of drinking water                                                                                                                                                                                                                                | 85.9       | 97.7            | 73.4     | 78.8     |
| % of solid fuel used for cooking                                                                                                                                                                                                                                                      | 75.4       | 71.3            | 92.9     | 94.6     |
| % electricity used for lighting                                                                                                                                                                                                                                                       | 66.7       | 76.1            | 28.0     | 67.4     |
| % having toilet facility                                                                                                                                                                                                                                                              | 61.6       | 63.7            | 88.2     | 75.0     |
| % Urbanization level                                                                                                                                                                                                                                                                  | 29.0       | 44.2            | 12.9     | 19.4     |
| <sup>1</sup> National literacy rate urban: 82.3% and rural: 62.5% with the eastern region, where the three study districts are located, has slightly higher (67.2%) than the national average. National literacy for older population is low: 26.2% for ages 60-64 and 20.8% for 65+. |            |                 |          |          |

Source: National Population and Housing Census 2011, Nepal

**Supplemental Table 3: Definition of a single condition and multimorbidity**

| <b>Conditions</b>            | <b>Definition<sup>1</sup></b>                                                                                      |
|------------------------------|--------------------------------------------------------------------------------------------------------------------|
| Hypertension                 | Self-reported hypertension and/or taking antihypertensive medications.                                             |
| Heart diseases               | Self-report of heart attack, angina, or “heart trouble,” or taking medications for heart diseases.                 |
| Stroke                       | Self-report of the previous stroke or taking medication for a recent episode of stroke.                            |
| Hypercholesterolemia         | Self-reported raised cholesterol and/or taking medication for hypercholesterolemia.                                |
| Diabetes                     | Self-reported diabetes and/or taking insulin or antidiabetic medications.                                          |
| Chronic respiratory diseases | Self-reported chronic respiratory diseases, asthma, COPD or taking medication for the conditions.                  |
| Chronic kidney disease       | Taking medication for chronic kidney disease or undergoing dialysis.                                               |
| Cancer                       | Taking medication for cancer; having past or current cancer therapy, including chemotherapy and radiation therapy. |
| Osteoarthritis               | Self-report of joint pain problems.                                                                                |

<sup>1</sup>Self-report was assessed by asking participants if a doctor or other health professional ever told them they had the given condition.
